# Supplementary material
Source: PubMed Central journal article supplement (PMC8600451)
Supplement: jamasurg-e215856-s001.pdf [file jamasurg-e215856-s001.pdf]

## Original iPVD Trial Protocol and Protocols for Lung Transplant Participants

| <b>Table of Contents</b>                                                                                           | <b>Page(s)</b> |
|--------------------------------------------------------------------------------------------------------------------|----------------|
| Randomization strata for Lung Transplants                                                                          | ii             |
| Original trial protocol (edited May 2017) - includes Lung Transplant and Advanced Heart Failure populations        | 1-6            |
| Original clinicaltrials.gov page for NCT03081052 - includes Lung Transplant and Advanced Heart Failure populations | 7-10           |
| Protocol - Adult Mechanical Ventilation                                                                            | 11-19          |
| Protocol – Epoprostenol: Adult Inhaled Pulmonary Vasodilator                                                       | 20-31          |
| Protocol – Transport of Mechanically Ventilated Cardiothoracic Patient on iNO or iEPO                              | 32-35          |
| Protocol – OR support for Epoprostenol                                                                             | 36             |
| Protocol – Return to OR from Cardiothoracic ICU on Epoprostenol                                                    | 37             |
| Protocol – Inhaled Nitric Oxide for the Adult Lung Transplant patients in the Cardiothoracic ICU                   | 38-41          |
| Protocol – Inhaled Epoprostenol for the Adult Lung Transplant Patient in the Cardiothoracic ICU                    | 42-45          |
| Final trial protocol (edited March 2019) - includes Lung Transplant and Advanced Heart Failure populations         | 46-56          |

64  
65  
66  
67  
68  
69  
70

Lung Tx  
(N=200)

SOLT

BOLT

Restrictive

Obstructive

Restrictive

PPH

Other

**PGD-3**

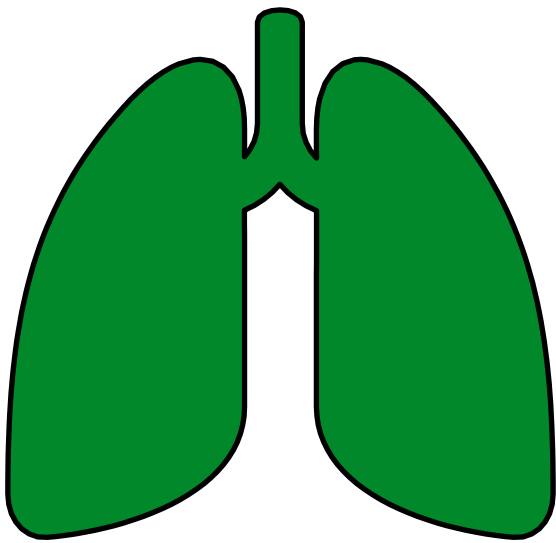

**1. Protocol Title:** Inhaled Pulmonary Vasodilator Therapy in Left Ventricular Assist Device (LVAD) Implantation, Heart Transplantation, and Lung Transplantation: Prospective, Randomized, Double-Blinded Study

**2. Purpose of the Study:**

*1. Aim I – Clinical Trial Investigation.* In order to utilize Inhaled Epoprostenol (iEPO, Veletri®, Actelion Pharmaceuticals, South San Francisco, CA, USA) as an acceptable alternative to Nitric Oxide (iNO, INOMAX®, Mallinkrodt Pharmaceuticals, St. Louis, MO, USA) in adult patients, we propose a randomized, prospective, double-blinded trial in the cardiothoracic surgical population, which will evaluate the primary hypothesis that these two medications will have similar efficacy in pulmonary vasodilation and a similar impact on clinical outcomes in end-stage lung disease patients undergoing lung transplantation and end-stage heart failure patients under durable LVAD implantation or heart transplantation (Table 1).

*2. Aim II – Cost-Capture Analysis.* There will be a parallel prospective cost-capture analysis designed to precisely acquire the expenses that each drug incurs per patient averaged across all patients randomized to that drug.

**3. Background & Significance:**

*Introduction.* Inhaled Nitric Oxide (iNO) is a selective pulmonary vasodilator (PVD) with FDA-approval in the neonatal population alone. In adult patients, iNO is used off-label to treat pulmonary hypertension, right ventricular (RV) failure, and ventilation-to-perfusion mismatch. Adult patients who undergo durable LVAD implantation (e.g. Heartware®, Heartmate 2®, or Heartmate 3®) or cardiac transplantation for end-stage heart failure or those that have endured lung transplantation as a result of end-stage lung disease, compose the largest subpopulation which receives PVD therapy at Duke University Hospital. Intravenous Epoprostenol is FDA approved for adult patients with pulmonary hypertension and is the only agent which has displayed mortality benefit in these patients. The inhaled formulation of Epoprostenol (iEPO) was developed in order to maintain efficacy and avoid the systemic side effects of vasodilation and thrombocytopenia. Inhaled iEPO is used off-label in our cardiothoracic surgical patients for new-onset perioperative pulmonary arterial hypertension (PAH), known preoperative PAH, RV dysfunction with LVEF > 35-40%, and promotion of ventilation to perfusion matching through alveolar deposition of the prostanoid compound and vasodilation of the intimately associated intra-acinar pulmonary arteries. This vasodilation can decrease pulmonary vascular resistance and can improve oxygenation while avoiding systemic effects commonly seen in the intravenous formulation. iEPO has been introduced in the cardiothoracic operating rooms (OR) and ICU as a cost-conscious alternative medication to iNO. iEPO may display an equivalent efficacy profile to iNO for pulmonary vasodilation and oxygenation and have a similar impact on clinical outcomes. For the purposes of this writing, thoracic transplantation will refer to both heart and lung transplantation.

*Pharmacology.* There are 3 major pathways that affect pulmonary vascular tone: 1) Nitric oxide (vasodilatory), 2) Prostaglandin (vasodilatory), and 3) Endothelin (vasoconstrictive) pathways. During cardiothoracic operations, particularly transplantation and LVAD surgery, there is an appreciable imbalance in these pathways, which favors vasoconstriction. iNO administration, exerts its mechanism of pulmonary vasodilation and ventilation-to-perfusion matching through exogenous NO delivery and iEPO applies a similar mechanism via exogenous prostacyclin delivery. Both agents are delivered through mechanical ventilation to ventilated alveoli in order to promote gas exchange at the capillary bed. Both inhaled medications are desirable in this population due to pulmonary selectivity, absence of systemic vasodilation, as well as fast onset (5-10 seconds for iNO and 30-60 seconds for iEPO) and quick titration owing to short-half lives (10-20 seconds for iNO and 1-2 minutes for iEPO). There is no decision tree involved in the use of iNO vs iEPO except for that patient's known drug allergies which may preclude use of one inhaled agent in favor of the other. Of note, endothelin antagonists (e.g. bosentan), which are not part of our perioperative standard practice, are PO medications

**Table 1. Study Summary**

|                           |                                                                                                                                                                                                                                                                                                                                                                                                                                                                                                                                                                                     |
|---------------------------|-------------------------------------------------------------------------------------------------------------------------------------------------------------------------------------------------------------------------------------------------------------------------------------------------------------------------------------------------------------------------------------------------------------------------------------------------------------------------------------------------------------------------------------------------------------------------------------|
| <b>Sample Size</b>        | N = 424 (50/50 by randomization strata)                                                                                                                                                                                                                                                                                                                                                                                                                                                                                                                                             |
| <b>Population</b>         | 1. Lung transplantation (N = 200)<br>2. Heart Transplantation / LVAD implantation (N = 224)                                                                                                                                                                                                                                                                                                                                                                                                                                                                                         |
| <b>Rationale</b>          | <ul style="list-style-type: none"> <li>• Comparison of iNO and iEpo impact on outcomes – evaluate for equivalency</li> <li>• PVD therapy indications:                             <ol style="list-style-type: none"> <li>1. <u>Lung Transplant:</u> Improvement of ventilator and perfusion matching after lung allograft implantation by vasodilation of ventilated pulmonary capillaries</li> <li>2. <u>Heart Transplant/LVAD Implantation:</u> Improvement of RV contractility after cardiac allograft implantation or LVAD implantation by PVR reduction</li> </ol> </li> </ul> |
| <b>Study Design</b>       | Prospective, Randomized, Double-Blinded                                                                                                                                                                                                                                                                                                                                                                                                                                                                                                                                             |
| <b>Primary Outcomes</b>   | 1. <u>Lung Transplant:</u> Severe PGD (grade 3)<br>2a. <u>Heart Transplant:</u> RVAD insertion<br>b. <u>LVAD:</u> INTERMACS Moderate or Severe RVF                                                                                                                                                                                                                                                                                                                                                                                                                                  |
| <b>Secondary Outcomes</b> | All populations: <ul style="list-style-type: none"> <li>• ICU LOS (days)</li> <li>• Hospital LOS (days)</li> <li>• Mechanical ventilator duration (hours)</li> <li>• Postoperative AKI</li> <li>• In-hospital mortality</li> <li>• Mortality 30-day, 90-day, 1-year</li> </ul>                                                                                                                                                                                                                                                                                                      |
| <b>Study length*</b>      | 24-36 months                                                                                                                                                                                                                                                                                                                                                                                                                                                                                                                                                                        |

§Sample size powered for primary outcomes  
\*Study length is determined through sample size divided by annual operations at Duke University Hospital; AKI = Acute kidney injury; iEpo = inhaled epoprostenol; iNO = Inhaled nitric oxide; ICU = Intensive care unit; LOS = Length of stay; LVAD = Left ventricular assist device; PGD = Primary graft dysfunction; PVD = Pulmonary vasodilators; PVR = Pulmonary vascular resistance; RVF = Right ventricular failure

## Research Summary – Inhaled Pulmonary Vasodilators in Thoracic Transplantation & LVAD Surgery

which require reliable gastrointestinal absorption that may not be present during high-dose inotropic support, and are not readily titrated to effect as are the inhaled PVD, iNO and iEPO.

**Contraindications and Adverse Effects.** Absolute indications for iNO in favor of iEPO are due to prostaglandin allergy leading to anaphylaxis (extremely rare) or if the patient is pregnant due to risk for labor induction as a result of prostacyclin agonism. Routine pregnancy testing is performed in the preoperative setting in line with established preoperative anesthesia testing criteria. Parturients rarely present for thoracic transplantation or LVAD implantation. There are no absolute contraindications to iNO therapy in adult patients but the iNO delivery device system routinely measures the toxic metabolite of iNO, nitrogen dioxide (NO<sub>2</sub>), which can lead to hypoxemia during metabolite accumulation. Additionally, methemoglobinemia (MetHb) is another rare adverse occurrence of prolonged iNO administration and MetHb levels are measured during arterial blood gas analysis.

**Preliminary retrospective study supporting noninferiority hypothesis.** In a retrospective study of 51 adult cardiothoracic surgical patients (all-comers, including thoracic transplantation, durable LVAD implantation, and non-transplant and non-LVAD cardiac surgical patients), requiring pulmonary vasodilation, our group illustrated similar efficacy between the use of iEPO and iNO with respect to optimizing RV hemodynamic variables,

including pulmonary vasodilation and mixed venous oxygenation (Table 2). During this investigation, iNO was initiated in the operating room (OR) and continued during transport and into the ICU. While in the ICU, postoperative hemodynamic stability was achieved within 2 hours and iNO was transitioned to iEPO over 30 minutes in order

Table 2. Hemodynamic values in CT surgical patients comparing inhaled Nitric Oxide and Epoprostenol

| N= 51   | *HR  | †MAP | ‡PAPs | §PAPd | ¶PAPm | ‡CVP | ‡CI  | PI   | §LVAD flow | ¶SVO2 (%) |
|---------|------|------|-------|-------|-------|------|------|------|------------|-----------|
| iNO     | 98   | 78   | 37.9  | 18.6  | 25.3  | 12.5 | 2.61 | 5.36 | 4.66       | 71        |
| iEpo    | 100  | 80   | 39.1  | 19.0  | 26.8  | 12.2 | 2.67 | 4.93 | 4.82       | 70        |
| P-value | 0.41 | 0.40 | 0.48  | 0.58  | 0.24  | 0.74 | 0.63 | 0.52 | 0.65       | 0.52      |

a = reported as mean values; \* units = beats per minute; † units = mm Hg; ‡ units = L/min/m<sup>2</sup>

CI = Cardiac Index, CVP = Central Venous Pressure, HR = Heart Rate, iNO = Inhaled nitric oxide, iEpo = Inhaled epoprostenol, LVAD = Left Ventricular Assist Device, MAP = Mean Arterial Pressure, PAPs = Systolic Pulmonary Artery Pressure, PAPm = Mean Pulmonary Artery Pressure, PAPd = Diastolic Pulmonary Artery Pressure, PI = Pulsatility Index, SvO<sub>2</sub> = Mixed Venous Oxygen Saturation

to provide continuous inhaled pulmonary vasodilation and allow the patient to self-control during medication cross-over between iNO and iEPO. Clinical variables were followed at 5-minute intervals for 1 hour after transition to iEPO. No statistically significant differences were seen in hemodynamic variables during this transition (Table 2). The small sample size and retrospective design, however, incorporated several confounding variables that could not be controlled and *prospective data was deemed necessary to achieve reliable conclusions by evaluating clinical outcomes in order to change clinician practice patterns.* Other investigations have demonstrated equivalence in hemodynamic variables, mixed venous oxygenation, and ventilation-to-perfusion matching when delivery of iNO was compared with iEPO. These studies were, however, also retrospective or inadequately powered to rely on conclusions related to outcome measures.

The large cost differential between these two agents remains an important concern for the health system: iNO is approximately 8-fold more expensive than iEPO, according to preliminary estimates based on PVD usage. Previous reports have estimated the cost of iNO administration to be between \$95.00 – \$115.00 per hour during medication delivery. The cost, however, has not precisely captured the time required to assemble the iNO delivery system as well as resources utilized to breakdown this setup into individual components following termination of delivery. The cost of iEPO delivery is captured at \$14.83 per hour, which includes solution compounding by pharmacy as well as processing for delivery and nebulization by respiratory care services. Additionally, the iEPO delivery-system setup is a one-time, fixed cost for the duration of administration. Similar secondary resource utilization capture for iEPO is required for accurate cost comparison between these two agents.

#### 4. Design & Procedures:

##### Aim 1 – Development of a Definitive Clinical Trial Investigation.

**1. Randomization and Double-Blinding.** The clinical research unit (CRU) will receive preoperative notification of lung and heart transplantation patients by reviewing the transplant waitlist. Preoperative notification of LVAD implantation will be done by the review of the cardiothoracic surgical schedule. Using a 50% randomization process utilized and established by the CRU at Duke University Hospital, each eligible patient will be randomized to receive either iNO or iEPO. The primary endpoint data will be collected and documented in an electronic data capture system during the period of time the patient, clinical care team, and study team are blinded. Primary endpoint data collection will be complete prior to the subjects' discharge from the ICU, at which point the unblinding will occur. Since primary endpoint data collection will occur during the blinded period, the potential for bias will be substantially minimized.

**2. Measured Outcomes.** The primary endpoint for the comparison of efficacy in the Lung Transplant population will be the incidence of Grade 3 Primary Graft Dysfunction (PGD). This is defined by the International Society of Heart and Lung Transplantation (ISHLT) as severe hypoxemia with a PaO<sub>2</sub>-to-FiO<sub>2</sub> ratio < 200 or the presence of venovenous extracorporeal membrane oxygenation (VV ECMO) at an time-point within the first 72

## Research Summary – Inhaled Pulmonary Vasodilators in Thoracic Transplantation & LVAD Surgery

hours after lung transplantation. The primary endpoint for the comparison of efficacy in LVAD patients will be incidence of moderate or severe RV failure according to Interagency Registry for Mechanically Assisted Circulatory Support (INTERMACS) scoring. The primary endpoint for the comparison of efficacy in the heart transplant subset will be the incidence rate of RVAD insertion. Secondary endpoints related to clinical outcomes for all populations will be duration of postoperative mechanical ventilation, ICU Length of Stay (LOS), hospital LOS, incidence of acute kidney injury, incidence of in-hospital mortality, as well as postoperative mortality at 30-days, 90-days, and 1-year after operation (Table 1).

### Aim II – Cost-Capture Analysis.

In parallel with the design & procedures of *Aim I*, the cost capture analysis component will be essential in order to better gauge the cost due to duration of administration (variable cost) according to each inhaled PVD. Established clinical criteria specific to each group (lung transplantation vs. heart transplantation/LVAD implantation) have been developed to determine the inception of protocolized PVD weaning. Weaning medications according to established protocols will allow for accurate interpretation of the comparative length of therapy between iNO and iEPO and help prevent erroneous PVD usage without criteria for discontinuation. Secondary resource utilization will be documented by respiratory care services and itemized cost sheets will be developed.

### Subject Groups

Inhaled PVD therapy is administered to every patient undergoing thoracic transplantation and LVAD implantation at our institution and each patient is eligible for enrollment. Over a 3-year period (1 year for follow-up) we will prospectively enroll 200 lung transplant subjects and 224 heart transplant or LVAD implantation patients who will be informed and consented prior to their scheduled procedure. Potential subjects will be under the care of 1 or more investigators in this study. Consented subjects will be randomly assigned to 1 of 2 groups, iNO vs iEPO, to be initiated in the OR on the day of the operation based on accepted standard of practice and study protocol. Medication administration will be double-blinded, such that neither the surgical nor anesthesiology teams will be notified of the inhaled agent to which the patient has been randomized. Ability to unblind the delivery system will be made available to both teams if required to preserve optimal patient care. As per our standard practice, respiratory care services will manage the initiation and maintenance of inhaled PVDs in the OR and ICU, and these personnel will be the only practitioners notified of the actual delivered medication during study blinding.

### Exclusion Criteria

- Combined Organ Transplantation (Heart-Lung, Heart-Liver, Heart-Kidney)
- Age < 18 years old
- Pregnancy (females of child bearing potential will receive pregnancy testing prior to cardiothoracic surgery as a standard of care)
- Known allergy to prostaglandin (rare)
- Subject is enrolled in another study protocol, which does not allow randomization of PVD therapy
- Heart transplant or durable LVAD recipients with adult congenital heart disease (CHD)
- Caveat: Does NOT meet exclusion criteria if the scheduled heart transplant or LVAD implantation is due to heart failure from a *previous heart transplantation* related to CHD, performed more than 90 days previous to the date of trial enrollment
- Patient is scheduled to undergo lung transplantation but has undergone heart transplantation in the previous 90 days
- Patient is scheduled to undergo durable LVAD implantation but has undergone heart transplantation in the previous 90 days
- Patient is scheduled to undergo heart transplantation but has undergone lung transplantation in the previous 90 days
- Patients with preoperative VV ECMO as a bridge to lung transplantation

Stopping Criteria – In the event the following criteria are met and the clinical team is in agreement, subjects will be weaned off of their iPVD per institutional standard iPVD weaning practice. If adverse events are encountered, the drug will be immediately stopped without weaning.

- Venoarterial (VA) ECMO insertion remains at end of operation
- VA ECMO insertion is performed postoperatively in the ICU
- LVEF < 30% on echocardiogram at the end of the operation for heart and lung transplant subjects
- LVEF < 30% for heart and lung transplant subjects on echocardiogram noted postoperative in the ICU

## Research Summary – Inhaled Pulmonary Vasodilators in Thoracic Transplantation & LVAD Surgery

- Inhaled pulmonary vasodilation is halted for reasons other than standard weaning ordered by the clinical care team
- Adverse events related to the INO or EPO that affect the subject's welfare

### Data Collection

*Secondary measures will be hemodynamic variables* (similar to those measured in Table 2) such as transesophageal echocardiographic (TEE) evaluation of RV function based on stand-of-practice protocol, intravenous administration of inotropes, serial measures of postoperative serum creatinine and GFR, resolution of elevated liver function tests (heart failure patients, illustrates improvement in RV function), incidence of thrombocytopenia (platelet count  $< 150 \times 10^9/L$ ) and trajectory of resolution, as well as ventilation-to-perfusion matching (arterial oxygen tension, PaO<sub>2</sub>; arterial carbon dioxide tension, PaCO<sub>2</sub>; and fraction of inspired oxygen, FiO<sub>2</sub>). Variables will be recorded at designated time points during the entire duration of administration – from initiation in the operating room to cessation in the ICU. These time points include: Intraoperative before surgical incision, time = 0 (initiation of PVD), 30 minutes, 2 hours, 6 hours, 12 hours, 18 hours, 24 hours, and every 6 hours up through 72 hours after initiation. These secondary measures will be obtained up through 72 hours after initiation regardless of cessation or continuation of the inhaled PVD. After 72 hours, increments of every 12 hours thereafter will be assessed if PVD administration continues. Ventilation and perfusion nuclear scans will be obtained and recorded per standard clinical practice for each group of lung transplant recipients. Established protocols with criteria for initiation of medication weaning have been created according to each medication based on individual pharmacokinetic properties. Once established criteria are met, weaning of each inhaled PVD will begin and continue until the medication is terminated according to standardized weaning protocols established for lung transplant patients and heart transplant/LVAD patients.

*Subject follow up.* Subject will be contacted by phone by a member of the research team and be asked a short series of questions to assess their current medical condition and any changes since surgery at 30-days ( $\pm 3$  days), 90-days ( $\pm 5$  days), and 1-year ( $\pm 7$  days) after surgery completion date. The phone follow-up should take approximately 5 minutes of the subject's time. If subjects have been admitted to a hospital outside of Duke Health after surgery they will be asked to sign an authorization of release to provide us permission to obtain medical information related to their hospitalization.

### Blood Sampling

Blood samples will be drawn for analysis as a part of this study. One 9 ml sample of blood will be obtained from each patient prior to the initiation of PVD therapy and stored at 4°C prior to processing. This sample will be stored for Genomic DNA analysis at the completion of this study in order to assess patients who are responders to inhaled pulmonary vasodilator through upregulation and down regulation of notable vasoactive substances (e.g. endothelin, thromboxane, nitric oxide, prostaglandin, etc.). In addition, each subject will also be asked to sign the Genomic and Proteomic Database Repository (IRB Pro00015651) consent form, thus allowing the banking of their plasma and DNA samples as well as data to be used for future research. Participation in IRB Pro00015651 is voluntary and optional to all subjects consented in this parent study. Blood samples (7 ml each) will be drawn at 3 separate time points: 1) directly after insertion of the invasive blood pressure monitoring (arterial) line, 2) POD 1, and 3) POD 7. In each 7ml blood sample, 3.5ml will be collected in Sodium Citrate tubes for coagulation analysis and another 3.5ml will be collected in EDTA tubes for metabolomic and proteomic analysis. Plasma will be separated from these samples and banked at -80°C for analyses of proteomic and metabolomic signatures. Up to 30ml of blood will be collected during the 12 month study participation period.

**6. Subject Identification, Recruitment, & Compensation:** Subjects will be recruited either during the outpatient or inpatient evaluation phase, or contacted by phone. Recruitment may also occur on the day of the operation given the complexities of the transplant process, which may provide obstacles to earlier enrollment. After obtaining permission from the operating surgeon, surgical subjects will be screened by the study coordinator by reviewing the transplant pre-list. Prior to asking any patient for consent to participate, the patient or Legally Authorized Representative (LAR) will be approached first by the surgeon or one of the members of the surgical care team to determine if the patient or LAR is willing to consider enrollment in the study. If so, the subject or LAR will either be seen during an inpatient or outpatient visit, or be contacted by phone and informed about the study by a member of the research team. If the individual or LAR is willing to consider enrollment and does not meet exclusion criteria, then the research coordinator will present the research protocol in its entirety. During this time, the study coordinator will answer any and all questions as they arise. If the subject or LAR agrees to participate, the coordinator will ask the them to sign and date the appropriate consent form. A copy of this consent form will be given to the subject and a copy of the consent form will be

## Research Summary – Inhaled Pulmonary Vasodilators in Thoracic Transplantation & LVAD Surgery

added to the subject's medical record. The subject or LAR will be given the option to sign a separate consent form to allow us to store portions of the collected blood specimens and any data collected under this research study and maintain these samples and data in a database/repository (PRO00015651) for possible use in future research studies relating to surgical outcomes. In the event a LAR provides consent at the time of enrollment, the subject will be approached once they regain the ability to provide an informed consent.

Recruitment will not routinely occur on the day of the operation and most patients will be enrolled at least 12 hours in advance and provided at least the allowable time to review the study consent form and discuss their options with the PI and study personnel. There will be no direct compensation to the patient for recruitment.

If a subject is enrolled and randomized in this study for their LVAD implantation procedure and is later planned to receive a heart transplant, that previously enrolled subject is eligible to be re-enrolled. The following caveats apply to this subpopulation of LVAD patients:

A) Durable LVAD implantation may occur as a bridge to heart transplantation.

B) If LVAD implantation is followed by heart transplantation WITHIN 1 year following LVAD implantation, then data collected up through the time of heart transplantation will be recorded and valid as a patient in the LVAD group.

C) Data collected on or after the date of LVAD explantation/heart transplantation for such a patient will be considered as part of the heart transplant group.

D) If LVAD implantation is followed by heart transplantation AFTER 1 year following LVAD implantation, then the 1-year follow-up period is complete and the patient may re-enter the trial as a heart transplant patient.

If a subject is enrolled and randomized in this study for their durable LVAD implantation procedure and is scheduled to receive a new durable LVAD via an LVAD exchange operation, the subject is eligible to be re-enrolled.

**7. Subject's Capacity to Give Legally Effective Consent:** Explicit (written) consent will be obtained from the patient or the patient's legal decision maker.

**8. Study Interventions:** Using a 50% randomization process utilized and established by the CRU, each eligible patient will be randomized to receive either iNO or iEPO, to be initiated in the OR based on accepted standard of practice at Duke University Hospital, during the clinical care of these patients.

**9. Risk/Benefit Assessment:** There is no direct benefit of this study to the enrolled subjects. Data gathered from this study may benefit future patients. Up to 30 ml of blood will be drawn during the 12-month study participation period. Blood sampling will be obtained, in the majority of subjects, from indwelling arterial or central venous lines inserted at the beginning of the intraoperative period as part of standard practice for these operations and there will be no additional risk to the patient for obtaining such vascular access. On rare occasion, blood sampling may be obtained from additional venipuncture sites during the postoperative period. Risks of blood sampling if obtained through venipuncture are pain, swelling, possible infection at the site of venipuncture. While these risks are minimal, the additional blood volume is highly unlikely to contribute to the patient's need for blood transfusion. To minimize any potential risk to the patient from genetic data, investigators and patients will be blinded to the individual patient's genotype. This information will not be included in the patient chart, will remain absolutely confidential, and will not be given to the patient or their family. DNA samples will be identified only by a coded number whose relation to the patient's name and other identifiers is available only to the data manager. The identity of the patient will remain anonymous in any publications which may result from this investigation.

There will be no additional risks to the subjects as a result of this study. Prior to June of 2015, iNO was the sole option for inhaled pulmonary vasodilation in this patient population and therefore utilized in each operation for this indication. As of June 2015, iEPO was introduced for the same indications as iNO in order to serve as a cost-conscious alternative to iNO and to potentially explore a different, equally impactful pathway for clinically evident pulmonary vasodilation (as measured by Swan-Ganz catheter data and determined by transesophageal echocardiography). There are no additional risks to the patient aside from the rare adverse effects such as allergic reaction, as previously discussed. The most common side effect of iNO is hypotension. The side effects common to intravenous iEPO are nausea, vomiting, hypotension, flushing, chest pain, anxiety, dizziness, bradycardia, difficulty breathing, abdominal pain, musculoskeletal pain and tachycardia.

**10. Costs to the Subject:** There will be no additional costs to the subjects as a result of this study.

**11. Data Analysis & Statistical Considerations:** Summary statistics will be computed for demographic, clinical, and outcome variables in the form of frequencies (percentage) for categorical variables and mean (standard deviation) for continuous variables for each arm. Univariate analysis will be performed to compare the difference of each variable between treatment groups by chi-square or Fisher exact tests for categorical variables, and t-tests or Wilcoxon Rank-Sum tests for continuous variables depending on data normality. The univariate results for the outcome variables will provide information on iNO treatment effect in comparison to iEPO without taking into account other potential confounding factors. All non-outcome variables meeting  $p < 0.15$  association with treatment group will be considered for variable selection to build a multivariable regression model. For each outcome of interest, we will start with a regression model (logistic regression for binary outcomes or generalized linear model for continuous outcomes) with all variables selected from univariate analysis described above. Based on stepwise variable selection, we will determine the final set of covariates to be included in the final multivariable model to test the treatment group effect. Based on the analysis results, we will be able to understand if iNO is equivalent to iEPO (no significant difference) or significantly better or worse than iEPO (significant treatment effect) to address the efficacy of iNO for Aim 1. Several of secondary measures will be obtained over time. We will apply generalized mixed model to take into account the repeated measures over time to test for treatment effect. In the case of patients have switched to the other arm due to clinical decision, we will conduct the primary analysis based on the intent to treat (ITT) without reclassifying treatment assignment. In addition, protocol analysis, where only patients follow the protocol assignment are included will also be conducted to verify ITT results. For Aim 2 to compare cost capture analysis, the comparison of cost measures between two groups will be tested by two sample t-test.

Based on recent *annual* operations, approximately 120 LVAD implantations, 60 heart transplantations, and 110 Lung transplantations were performed at Duke University Hospital during FY 2014 – 2015. This study has been individually powered to primary endpoints for each arm (Table 1) and the duration of study enrollment has been determined according to annual operations and sample-size calculations. We estimated sample size based on equivalence test of the incidence rates of a binary outcome (e.g. PGD grade 3 (PGD-3)) of two treatment groups as an illustration. Assuming the incidence rate of PGD-3 under iEPO treatment is 0.35 and acceptable margin of the equivalence is  $\pm 0.19$ , we will need 224 patients to have 80% power to detect an actual difference at 0.05 between two treatment group under this margin. This implies that the acceptable range of incidence rate for iNO treatment is from 0.21 to 0.59. Based on this estimate, we propose to enroll 200 lung transplant patients and 224 LVAD and heart transplant patients ( $n = 424$ ) over a period of 24 to 36 months; the exact time point for trial culmination between 24 and 36 months will be dependent on enrollment rate. There will be a 50% randomization rate for each inhaled agent such that 212 patients will receive iEPO and 212 patients will receive iNO.

**12. Data & Safety Monitoring:** The proposal is not introducing a new medication that has not been utilized by our group and safety has been established for this patient population through clinical practice and medication usage. Safety will, however, be determined by assessing reported, rare, adverse effects of iNO (systemic hypotension, methemoglobinemia, and rebound pulmonary hypertension after appropriate weaning) and iEPO (systemic hypotension, non-surgical bleeding related to thrombocytopenia, flushing, and rebound pulmonary hypertension after appropriate weaning) in order to accurately monitor adverse events (AE) during this study. The PI will review and sign off on AE's as they occur and perform a quarterly review and determine if AE's are related to the study or otherwise. AE's will be reported to the IRB per HRPP policies.

*Stopping Rule:* Subjects who meet the stopping criteria in section 4 will continue to be enrolled and followed for primary outcome analysis.

**13. Privacy, Data Storage & Confidentiality:** All data collected in the case report forms (CRF) will be collected by review of the subjects routine medical record documentation or during the intraoperative portion of the study. All subjects will be given a study ID in an order to maintain their identity and subject's identity will be protected and confidentially maintained. Barcodes will be affixed to each study sample collected according to the protocol. For future review, the study number and barcode will be the only identifying information associated with the subject. All paper data will be stored in a locked cabinet in the research teams office as outlined in the research data security plan. Any computerized data will be stored within the Duke University Medical Center's Database, which is password protected, and located behind Duke Computing firewalls. Only the PI and the statisticians will have access to the data obtained from these cases.



# ClinicalTrials.gov

Try our beta test site

**IMPORTANT:** Listing of a study on this site does not reflect endorsement by the National Institutes of Health. Talk with a trusted healthcare professional before volunteering for a study. [Read more...](#)

Trial record 1 of 4 for: ghadimi

[Previous Study](#) | [Return to List](#) | [Next Study](#)

## Inhaled Pulmonary Vasodilator Therapy in Left Ventricular Assist Device (LVAD) Implantation, Heart Transplantation, and Lung Transplantation: Prospective, Randomized, Double-Blinded Study (iNO vs iEPO)

**This study is not yet open for participant recruitment.** (see [Contacts and Locations](#))

*Verified March 2017 by Duke University*

**Sponsor:**  
Duke University

**Information provided by (Responsible Party):**  
Duke University

438  
439  
440  
441  
442  
443

**ClinicalTrials.gov Identifier:**

NCT03081052

First received: March 8, 2017

Last updated: March 14, 2017

Last verified: March 2017

[History of Changes](#)

[Full Text View](#)

[Tabular View](#)

[No Study Results Posted](#)

[Disclaimer](#)

[How to Read a Study Record](#)

### Purpose

The primary purposes of this study has 2 aims. First, to conduct a clinical investigation to determine if iEPO, Veletri® will have similar efficacy in pulmonary vasodilation and have a similar impact when compared to iNO, INOMAX® in adult patient who undergo a heart transplantation, lung transplantation or implantation of a left ventricular assist device . Second, to conduct a cost-capture analysis on the expense each drug incurs per patient.

| Condition                | Intervention | Phase   |
|--------------------------|--------------|---------|
| Heart Transplant Surgery | Drug: iNO    | Phase 4 |
| Lung Transplant Surgery  | Drug: iEPO   |         |

Study Type: Interventional  
 Study Design: Allocation: Randomized  
 Intervention Model: Parallel Assignment  
 Masking: Participant, Care Provider, Investigator  
 Primary Purpose: Other

Official Title: Inhaled Pulmonary Vasodilator Therapy in Left Ventricular Assist Device (LVAD) Implantation, Heart Transplantation, and Lung Transplantation: Prospective, Randomized, Double-Blinded Study

**Resource links provided by NLM:**

[MedlinePlus](#) related topics: [Heart Transplantation](#) [Lung Transplantation](#)

[Drug Information](#) available for: [Nitric oxide](#)

[U.S. FDA Resources](#)

**Further study details as provided by Duke University:**

Primary Outcome Measures:

Incidence of Grade 3 Primary Graft Dysfunction (PGD) for Lung Transplant subjects. [ Time Frame: Up to 72 hours ]

This is defined by the International Society of Heart and Lung Transplantation (ISHLT) as severe hypoxemia with a PaO<sub>2</sub>-to-FiO<sub>2</sub> ratio < 200 or the presence of venovenous extracorporeal membrane oxygenation (VV ECMO) at an time-point within the first 72 hours after lung transplantation.

- Incidence of moderate or severe RV failure for the LVAD implantation subjects. [ Time Frame: up to approximately 21 days after LVAD placement ]  
This is defined by the Interagency Registry for Mechanically Assisted Circulatory Support (INTERMACS) scoring.
- Incidence of severe RV failure for Heart Transplantation subjects. [ Time Frame: up to approximately 30 days after heart transplantation ]  
This is defined by the incidence of an RVAD placement

Secondary Outcome Measures:

- Duration of postoperative mechanical ventilation [ Time Frame: up to approximately 90 days ]  
Length of time from intubation until patient is extubated
- Per patient cost [ Time Frame: up to approximately 30 days ]  
Cost associated with the duration of PVD administration
- Length of ICU stay [ Time Frame: up to approximately 90 days ]  
Length of time from ICU admission from surgery until ICU discharge
- Length of hospital stay [ Time Frame: up to approximately 1 year ]  
Length of time from surgery to hospital discharge
- Incidence of Acute Kidney Injury [ Time Frame: up to approximately 14 days ]  
defined by KDIGO-AKI criteria
- Incidence of in-hospital mortality [ Time Frame: up to approximately 1 year ]  
Death that occurs during the hospital stay
- Incidence of postoperative mortality within 30 days [ Time Frame: up to approximately 30 days ]  
From the day of surgery to 30 days (+/- 3 days)
- Incidence of post-operative mortality within 90 days [ Time Frame: up to approximately 90 days ]  
From the day of surgery to 90 days (+/- 5 days)
- Incidence of post-operative mortality within 1 year [ Time Frame: up to approximately 1 year ]  
From the day of surgery to 1 year (+/- 7 days)

Estimated Enrollment: 424  
 Anticipated Study Start Date: April 2017  
 Estimated Study Completion Date: April 2021  
 Estimated Primary Completion Date: April 2021 (Final data collection date for primary outcome measure)

| <u>Arms</u>                                                      | <u>Assigned Interventions</u>                                                                                    |
|------------------------------------------------------------------|------------------------------------------------------------------------------------------------------------------|
| Active Comparator: Lung transplant with iNO                      | Drug: iNO<br>Subject will receive inhaled Nitric Oxide in this intervention<br>Other Name: Inhaled Nitric Oxide  |
| Active Comparator: Lung transplant with iEPO                     | Drug: iEPO<br>Subject will receive inhaled Epoprostenol in this intervention<br>Other Name: Inhaled Epoprostenol |
| Active Comparator: Heart transplant & LVAD implantation with iNO | Drug: iNO                                                                                                        |

|                                                                   |                                                                                                                  |
|-------------------------------------------------------------------|------------------------------------------------------------------------------------------------------------------|
|                                                                   | Subject will receive inhaled Nitric Oxide in this intervention<br>Other Name: Inhaled Nitric Oxide               |
| Active Comparator: Heart transplant & LVAD implantation with iEPO | Drug: iEPO<br>Subject will receive inhaled Epoprostenol in this intervention<br>Other Name: Inhaled Epoprostenol |

**Detailed Description:**

Inhaled Nitric Oxide (iNO) is a selective pulmonary vasodilator (PVD) with FDA-approval in the neonatal population alone. In adult patients, iNO is used off-label to treat pulmonary hypertension, right ventricular (RV) failure, and ventilation-to-perfusion mismatch. Adult patients who undergo durable LVAD implantation (e.g. Heartware®, Heartmate 2®, or Heartmate 3®) or cardiac transplantation for end-stage heart failure or those that have endured lung transplantation as a result of end-stage lung disease, compose the largest subpopulation which receives PVD therapy at Duke University Hospital. Inhaled Epoprostenol (iEPO) has been introduced in the cardiothoracic operating rooms (OR) and ICU as a cost-conscious alternative medication to iNO. iEPO may display an equivalent efficacy profile to iNO for pulmonary vasodilation and oxygenation and have a similar impact on clinical outcomes.

424 informed and consented subjects undergoing thoracic transplantation or left ventricular assist device (LVAD) implantation under the care of one or more investigators will be prospectively enrolled over a three-year period (one-year for follow-up). Patients will be randomly assigned 50/50 according to randomization strata to one of two standard of care pulmonary vasodilation therapy, iNO vs iEPO. Additional study procedures will involve data collection and blood sampling.

**▶ Eligibility**

Ages Eligible for Study: 18 Years and older (Adult, Senior)  
Sexes Eligible for Study: All  
Accepts Healthy Volunteers: No

**Criteria****Inclusion Criteria:**

- Thoracic (heart or lung) transplantation patients
- LVAD implantation patients

**Exclusion Criteria:**

- Combined Organ Transplantation (Heart-Lung, Heart-Liver, Heart-Kidney)
- Age < 18 years old
- Pregnancy
- Known allergy to prostaglandin (rare)
- Subject is enrolled in another study protocol, which does not allow randomization of PVD therapy
- Heart transplant or durable LVAD recipients with adult congenital heart disease (CHD) o Caveat: Does NOT meet exclusion criteria if the scheduled heart transplant or LVAD implantation is due to heart failure from a previous heart transplantation related to CHD, performed more than 90 days previous to the date of trial enrollment
- Patient is scheduled to undergo lung transplantation but has undergone heart transplantation in the previous 90 days
- Patient is scheduled to undergo durable LVAD implantation but has undergone heart transplantation in the previous 90 days
- Patient is scheduled to undergo heart transplantation but has undergone lung transplantation in the previous 90 days
- Patients with preoperative Venovenous ECMO as a bridge to lung transplantation

**▶ Contacts and Locations**

Choosing to participate in a study is an important personal decision. Talk with your doctor and family members or friends about deciding to join a study. To learn more about this study, you or your doctor may contact the study research staff using the Contacts provided below. For general information, see [Learn About Clinical Studies](#).

Please refer to this study by its ClinicalTrials.gov identifier: NCT03081052

**Contacts**

Contact: Tiffany L Bisanar, RN, BSN 919-681-0866 [tiffany.bisanar@duke.edu](mailto:tiffany.bisanar@duke.edu)

Contact: Kamrouz Ghadimi, MD 919-681-6532 [kamrouz.ghadimi@duke.edu](mailto:kamrouz.ghadimi@duke.edu)

**Sponsors and Collaborators**

Duke University

**Investigators**Principal Investigator: Kamrouz **Ghadimi**, MD Duke Health **More Information**

Responsible Party: Duke University  
ClinicalTrials.gov Identifier: [NCT03081052](#) [History of Changes](#)  
Other Study ID Numbers: Pro00078035  
Study First Received: March 8, 2017  
Last Updated: March 14, 2017  
Individual Participant Data  
Plan to Share IPD: No

Studies a U.S. FDA-regulated Drug Product: Yes  
Studies a U.S. FDA-regulated Device Product: No  
Product Manufactured in and Exported from the U.S.: No

Keywords provided by Duke University:  
Heart and Lung transplantation surgery  
Pulmonary vasodilation therapy

## Additional relevant MeSH terms:

|                                  |                                                |
|----------------------------------|------------------------------------------------|
| Nitric Oxide                     | Free Radical Scavengers                        |
| Vasodilator Agents               | Antioxidants                                   |
| Bronchodilator Agents            | Molecular Mechanisms of Pharmacological Action |
| Autonomic Agents                 | Neurotransmitter Agents                        |
| Peripheral Nervous System Agents | Endothelium-Dependent Relaxing Factors         |
| Physiological Effects of Drugs   | Gasotransmitters                               |
| Anti-Asthmatic Agents            | Protective Agents                              |
| Respiratory System Agents        |                                                |

ClinicalTrials.gov processed this record on May 05, 2017

574  
575 Adult Mechanical Ventilation Protocol for Routine Post-Op Cardiothoracic Surgery and Lung Transplant  
576 Patients

577  
578  
579 **Purpose:** To provide consistent clinical practice and timely interventions in the management of  
580 cardiothoracic surgical (CTICU) patients who require mechanical ventilation.

581  
582  
583 **Protocol Initiation:**  
584  
585 The Mechanical Ventilation Protocol will be initiated upon receipt of a provider's order e.g. "CTICU  
586 Mechanical Ventilation Protocol".

587  
588 Upon receipt of a provider's order, the respiratory care practitioner will:

- 589
- 590  Based upon the patient's diagnosis and surgical procedure, select the appropriate arm of the  
591 protocol from the following choices:
    - 592  Ventilation Protocol - Cardiothoracic Surgery Patients (Section IV)
    - 593  Ventilation Protocol - Lung Transplant Surgery Patients (Section V)
  - 594  Determine initial ventilator settings and initiate mechanical ventilation.

- 595  Assess the patient's response to the level of mechanical ventilation support provided.
- 596  Communicate the initial mechanical ventilation settings and all subsequent changes to other
- 597 members of the patient care team.
- 598  Document all interventions in the medical record.
- 599

600 **Ventilation Protocol – Cardiothoracic Surgery Patients**

601 **Goals**

- 602  To maintain the patient's arterial pH between 7.35 and 7.45
- 603  To maintain the patient's PaO<sub>2</sub> between 60 and 85 mm Hg
- 604  To maintain the patient's PaCO<sub>2</sub> < 50 mm Hg
- 605  To maintain the patient's SpO<sub>2</sub> > 90%
- 606  To maintain an ETCO<sub>2</sub> < 45 mm Hg and PaCO<sub>2</sub> < 50 mm Hg (during re-warming and shivering)
- 607  To provide an inspiratory pressure plateau of no greater than 30 cm H<sub>2</sub>O

608

609 **Initial Mode and Setting Selection**

- 610
- 611  Mode: The initial mode may be one of the following:
  - 612  Pressure Assist-Control (PAC)
  - 613  Pressure Support (PSV)
- 614  Inspiratory Pressure (Tidal Volume) - Adjusted to achieve targeted tidal volume and comfort
  - 615  Inspiratory pressure will be set to achieve an exhaled VT of 4-8 mL/kg of the patient's
  - 616 ideal body weight
  - 617  Total pressure will not exceed 30 cm H<sub>2</sub>O.
- 618  Respiratory Rate (f) - 14 (then adjusted to control PaCO<sub>2</sub>)
- 619  Inspiratory Time will be set to optimize patient comfort, avoid or minimize air trapping, and
- 620 produce an I:E ratio of less than 1:1
- 621  FiO<sub>2</sub> and PEEP
  - 622  FiO<sub>2</sub> - 0.6 (unless otherwise ordered by anesthesiologist)
  - 623  PEEP - 5 cm H<sub>2</sub>O
- 624  Pulmonary Vasodilator Therapy: Per provider order.
- 625  Non-invasive Monitoring (Continuous):
  - 626  Pulse Oximetry
  - 627  Capnography
    - 628  Continuously from admission to unit until extubation or for up to 24 hours post
    - 629 admission.
    - 630  Patients receiving trach collar trials.
    - 631  24 hours post reintubation
    - 632  On the order of a provider

633 **Subsequent Adjustments/Weaning**

- 634  Obtain an ABG within 30 minutes after admission:

- 635 ○ Assess the PaCO<sub>2</sub>–ETCO<sub>2</sub> gradient. If < 10 mm Hg, patient stable, no acidosis, use
- 636 ETCO<sub>2</sub> to adjust respiratory rate unless otherwise stated.
- 637 □ Management during re-warming and shivering
- 638 ○ Adjust respiratory rate to keep ETCO<sub>2</sub> < 45 mm Hg, PaCO<sub>2</sub> < 50 mm Hg
- 639 □ Oxygenation adjustments
- 640 ○ Wean FiO<sub>2</sub>
- 641 ! If SpO<sub>2</sub> > 90% (PaO<sub>2</sub> > 60 mm Hg) to a FiO<sub>2</sub> goal of 0.4
- 642 ■ Notify MD if SpO<sub>2</sub> < 90%, PaO<sub>2</sub> < 60 mm Hg or if unable to obtain a FiO<sub>2</sub> of 0.4
- 643 within 4 hours.
- 644 ○ Increase FiO<sub>2</sub>/PEEP if indicated (see Appendix A)
- 645 ■ For a patient with a VAD: Keep PEEP at 5 cm H<sub>2</sub>O unless directed otherwise by
- 646 provider order.
- 647 □ Respiratory rate adjustments
- 648 ○ Patient must be hemodynamically stable without shivering or bleeding requiring
- 649 treatment, temperature > 36°C, responsive and breathing spontaneously (RN will begin
- 650 weaning sedation when patient begins to waken.)
- 651 ○ Assess ABG to ensure PaO<sub>2</sub> > 60 mm Hg, PaCO<sub>2</sub> < 50 mm Hg, pH 7.35-7.45
- 652 □ Elevate HOB 30° unless otherwise ordered or contraindicated (i.e. intra-aortic balloon pump)
- 653 □ Change to PSV 10 cm H<sub>2</sub>O (40%, 5 PEEP) from PAC when ETCO<sub>2</sub> < 45 mm Hg and reliable,
- 654 spontaneous respiratory drive present.
- 655 □ Extubation – Refer to the following...
- 656 ○ Appendix D: Daily Spontaneous Breathing Assessment and Trial (SBT) and
- 657 ○ Appendix F: Extubation Criteria
- 658 □ Weaning from Mechanical Ventilation – Trach Collar Trials
- 659 ○ Appendix E. Trach Collar Trial Weaning
- 660
- 661

## 662 Ventilation Protocol - Lung Transplant Surgery Patients

663

664 Goals: The goals of the Lung Transplant Surgery Protocol include all of the following:

- 665
- 666 □ To maintain the patient's arterial pH between 7.35 and 7.45
- 667 □ To maintain the patient's PaO<sub>2</sub> between 60 and 85 mm Hg
- 668 □ To maintain the patient's SpO<sub>2</sub> > 90%
- 669 □ To maintain the patient's PaCO<sub>2</sub> < 50 mm Hg
- 670 □ To maintain an ETCO<sub>2</sub> < 45 mm Hg and PaCO<sub>2</sub> < 50 mm Hg (during re-warming and shivering)
- 671 □ Respiratory rate ≤ 16
- 672 □ To provide an inspiratory pressure plateau of no greater than 30 cm H<sub>2</sub>O

## 673 Initial Mode and Setting Selection upon Admission to CTICU

- 674 □ Mode: The initial mode will be Pressure Assist-Control (PAC)
- 675 □ Inspiratory Pressure (Tidal Volume)
- 676 ○ Inspiratory pressure will be set to achieve an exhaled VT of 4-8 mL/kg of the patient's
- 677 ideal body weight.
- 678 ■ Total pressure will not exceed 30 cm H<sub>2</sub>O.

- 679  Respiratory Rate (f) = 10 (then adjusted to control PaCO<sub>2</sub>)
- 680  FiO<sub>2</sub> and PEEP
  - 681  Start with a FiO<sub>2</sub> of 0.21 to achieve a PaO<sub>2</sub> > 65
  - 682  PEEP = 8 cm H<sub>2</sub>O
- 683  Inspiratory Time (Ti) will be set between 1.4-1.6 seconds on sedated patients.
- 684  Pulmonary Vasodilator Therapy: Per provider order.
- 685  Non-invasive Monitoring (Continuous):
  - 686  Pulse Oximetry
  - 687  Capnography
    - 688  Continuously from admission to unit until extubation or for up to 24 hours post admission.
    - 689  Patients receiving trach collar trials.
    - 690  24 hours post reintubation
    - 691  On the order of a provider.
    - 692  On the order of a provider.

#### 693 Subsequent Adjustments and Weaning

- 694  Obtain an arterial blood gas within 30 minutes after admission:
  - 695  Assess the PaCO<sub>2</sub> – ETCO<sub>2</sub> gradient. If < 10 mm Hg, patient stable, no acidosis, use ETCO<sub>2</sub> to adjust respiratory rate unless otherwise stated.
- 696  Oxygenation: : Appendix A: FiO<sub>2</sub>/PEEP Table
- 697  Management during re-warming and shivering
  - 698  Adjust respiratory rate to keep ETCO<sub>2</sub> < 45 mm Hg, PaCO<sub>2</sub> < 50 mm Hg
  - 699  Treat shivering (nursing)
- 700  Elevate HOB 30° unless otherwise ordered
- 701  Weaning
  - 702  Patient must be hemodynamically stable.
  - 703  Assess ABG to ensure PaO<sub>2</sub> > 65 mm Hg, PaCO<sub>2</sub> < 50 mm Hg, pH 7.35-7.45
  - 704  Change to PSV 10 cm H<sub>2</sub>O (40%, 5 PEEP) from PAC when ETCO<sub>2</sub> < 45 mm Hg, and reliable, spontaneous respiratory drive present.

#### 705 Extubation – Refer to the following...

- 706  Appendix D: Daily Spontaneous Breathing Assessment and Trial (SBT) and
- 707  Appendix F: Extubation Criteria

#### 708 Weaning from Mechanical Ventilation – Trach Collar Trials

- 709  Appendix E. Trach Trial Weaning

710 **Patient Assessment and Ventilator Monitoring** – Patient assessment and ventilator monitoring will be performed to determine the patient’s clinical status and progress toward goals.



- 725
- 726
- 727
- 728
- 729
- 730
- 731
- 732
- 733
- 734
- 735
- 736
- 737
- 738
- 739
- 740
- 741
- 742
- 743
- The RCP will assess the patient and monitor the ventilator...
    - Immediately after initiating mechanical ventilation
    - At 6-hour intervals (approximately) thereafter
    - Whenever there is a change in the level of support (mode) provided or a change in settings that effects minute ventilation or mean airway pressure.
    - Whenever there is an acute change in the patient's condition signaled by a rapid deterioration in vital signs or oxygenation or a change in ventilation.
  - Patient assessment and ventilator monitoring will consist of...
    - An evaluation of the performance of the mechanical ventilator to include:
      - Settings and monitored data
      - Graphics – waveforms and loops (if available)
    - An evaluation of the patient's response to ventilation support (to include but not limited to):
      - Breath sounds, vital signs, and physical appearance
      - Arterial blood gases (if available)
      - Data from non-invasive monitors, e.g. SpO2 and ETCO2
      - Chest radiograph (if available)

744 **Action to be taken in the event of an acute deterioration in the patient's clinical condition.**

745

746 In the event of an acute deterioration in the patient's condition during the course of mechanical

747 ventilation as evidenced by acute oxygen desaturation (SpO2 < 80%), acute hypotension (mean BP drop

748 of > 20 mmHg), an acute increase in airway pressure or an acute decrease in tidal volume the respiratory

749 care practitioner will...

- 750
- 751
- 752
- 753
- 754
- 755
- 756
- 757
- 758
- 759
- 760
- 761
- 762
- 763
- 764
- 765
- Immediately notify the nurse and provider.
  - Manually ventilate the patient with a manual resuscitator set to deliver a FiO2 of 1.0.
  - Assess the patient to rule out one of the following conditions:
    - Acute airway obstruction
    - Bronchospasm
    - Pneumothorax
    - Flash pulmonary edema
    - Aspiration
    - Airway misplacement – e.g. accidental extubation or decannulation, intubation of the right-mainstem bronchus.
    - Equipment failure
    - System leak/disconnect
  - Recommend to the provider that an arterial blood gas sample be obtained if the acute decompensation has resulted in profound hypoxemia or acute hypotension.
  - Recommend to the provider that a “stat” chest radiograph be obtained.

766 **Appendix A: FiO2/PEEP Table**

767  
768

769 Oxygenation Goals:

770  
771

- 772  60 mm Hg ≤ PaO2 ≤ 85 mm Hg (
- 773  SaO2 > 90%
- 774  SpO2 > 90%

775

776 Clinical Application of Standard: If not at goal, move up one step, if above goal(s) move down one step –

777

PEEP adjustments within each step are based on clinical assessment.

778

779

780

| FiO2      | PEEP |
|-----------|------|
| <.40      | 5    |
| 0.40-0.60 | 5-8  |
| > 0.60    | 8-15 |

781

782

783

784

785

786 **Appendix B: Arterial Blood Gases**

787

788 An arterial blood gas sample should be obtained within 30 minutes following the initiation of mechanical

789

ventilation.

790

791

Subsequent arterial blood gas samples should be obtained...

792

793

794

795

796

797

798

799

800

801

802

803

804

805

805

806 **Appendix C: Tolerance Criteria**

807 Patient may be considered intolerant of the partial support settings or a SBT if any of the following  
808 exists:

- 809
- 810  Development of rapid, shallow breathing:  $f \geq 35$  or an increase of  $\geq 10$  breaths per minute over
- 811 previous respiratory rate.
- 812  Intolerable dyspnea, diaphoresis, excessive use of accessory muscles, or development of
- 813 paradoxical respirations.
- 814  Heart rate  $> 120$  or a change in heart rate of  $\geq 20$  that cannot be attributed to another cause.
- 815  Diastolic blood pressure change of 20 mm Hg that cannot be attributed to another cause.
- 816  Development of cardiac arrhythmia, deterioration of mental state, or deterioration of arterial
- 817 blood gases.

818

#### 819 **Appendix D. Daily Spontaneous Breathing Trial**

820

821 The patient requiring mechanical ventilation should be assessed daily to determine readiness for  
822 extubation and discontinuation of mechanical ventilation support with a Spontaneous Breathing Trial  
823 (SBT). In patients requiring mechanical ventilation for more than 21 days, SBTs should be considered  
824 when on PSV.

825

- 826  The RCP will conduct a SBT on patients who meet the following indications:
  - 827   $FiO_2 \leq 0.4$
  - 828   $PEEP \leq 8$  cm H<sub>2</sub>O
  - 829  A reliable, spontaneous respiratory drive regardless of mode or level of support
  - 830 provided.
  - 831  Tolerance criteria outlined in Appendix C is met.
  - 832  The patient's overall condition is stable or improving.
- 833  A SBT is not indicated for patients...
  - 834  receiving neuromuscular blockade
  - 835  on HFOV
  - 836  with an inspiratory to expiratory ratio  $\geq 1:1$
  - 837  with a  $pH \leq 7.20$
  - 838  with an impending MI
  - 839  with a BP systolic of  $< 80$ ; MAP  $< 60$ , or HR  $> 120$  and/or the need for vasopressor
  - 840 therapy (dopamine or dobutamine)  $\geq 10$   $\mu$ g/kg/min, or more than one vasopressor to
  - 841 maintain hemodynamic stability
- 842  The SBT will be performed with a low level of CPAP (5-8 cm H<sub>2</sub>O), PSV 5 with 5-8 cm H<sub>2</sub>O PEEP,
- 843 or automatic tube/airway compensation (ATC/AAC) while maintaining the ventilator's  $FiO_2$ .
- 844  The head of the bed should be elevated to 30 degrees.
- 845  The RCP will monitor the patient closely for the first five minutes of the SBT to assess tolerance
- 846 and, if tolerated the SBT will continue for at least 30 minutes but not greater than 120 minutes.
- 847 Patients who tolerate the SBT will be considered for extubation (see Tolerance Criteria in
- 848 Appendix C).
- 849  At the completion of the trial, the following will be documented in the medical record:
  - 850  Mode (e.g., PS-SBT, CPAP-SBT or ATC/AAC)
  - 851  Respiratory rate
  - 852  Minute volume
  - 853  Tidal volume

- 854 ○ f/VT
- 855 □ Patients who fail the SBT trial will be returned to mechanical ventilation at previously tolerated
- 856 settings.
- 857 □ A note will be entered into the medical record to indicate the reason for failure (e.g., high f/VT).
- 858 □ A note will be entered into the medical record to indicate the reason a SBT was not indicated in
- 859 patients not receiving an SBT despite meeting criteria above
- 860 □ Extubation
- 861 ○ The RCP will recommend extubation or discontinuing mechanical ventilation support
- 862 when the patient meets the extubation criteria listed in Appendix F.
- 863 ○ The RCP will extubate the patient upon receipt of a provider's order.
- 864

#### 865 **Appendix E. Spontaneous Breathing Trials in tracheotomized patients**

- 866
- 867 □ Spontaneous breathing trials for tracheotomized patients combine periods of spontaneous
- 868 breathing, generally of increasing duration, with periods of mechanical ventilation support for
- 869 patients who meet criteria in Appendix D.
- 870 □ The decision to initiate and conduct these trials will be made by the medical care team as part of
- 871 the daily plan of care. A provider's order is required to initiate a spontaneous breathing trial for
- 872 tracheotomized patients.
- 873 □ The patient will be removed from mechanical ventilation support and placed on a High Flow
- 874 device. Flow and FiO<sub>2</sub> will be adjusted to meet SpO<sub>2</sub> goal.
- 875 □ The patient will be placed on a continuous end tidal CO<sub>2</sub> monitor with alarms set 10mmHG
- 876 above and below their established baseline end tidal CO<sub>2</sub>.
- 877 ○ \*ETCO<sub>2</sub> will not be monitored during Passy-Muir Valve use.
- 878 ○ \*ETCO<sub>2</sub> may be discontinued once the patient is successfully liberated from mechanical
- 879 ventilation > 48 hours.
- 880 □ Patient tolerance will be assessed (Appendix C).
- 881 □ The RCP will return the patient to mechanical ventilation support...
- 882 ○ If the patient fails to meet tolerance criteria, or
- 883 ○ According to the time interval determined by the medical team (plan of care), or
- 884 ○ To "rest" the patient overnight with the intention of continuing trial the following
- 885 morning.
- 886

#### 887 **Appendix F: Extubation Criteria**

888

889 A patient should be considered for extubation when the following criteria are met:

- 890
- 891 □ Patient is able to tolerate a Spontaneous Breathing Trial.
- 892 □ Adequate airway protection, a reliable respiratory drive, and airway suctioning no more
- 893 frequently than every two hours.
- 894 □ Successful 'cuff leak test' in patients suspected of possible upper airway abnormalities.
- 895 □ NIFM ≥ -25 (Lung Transplant Patients)
- 896 □ Diaphragm unclamped (Lung Transplant Patients)
- 897
- 898

REFERENCES

900 Epoprostenol: Adult Inhaled Pulmonary Vasodilator Protocol

901

902

903

904 **PATIENT POPULATION:**

905

906 Patients receiving Nitric Oxide (iNO) for pulmonary vasodilator therapy are eligible for continuous  
907 aerosolized or inhaled epoprostenol .

908

909 **DESCRIPTION:**

910

911 Veletri is a naturally occurring prostaglandin that serves as a potent vasodilator and is an effective  
912 inhibitor of platelet aggregation. Aerosolized Veletri is used as a selective pulmonary vasodilator when  
913 administered by inhalation, it has been shown to improve oxygenation, reduce pulmonary shunt,  
914 lower pulmonary artery pressure and pulmonary vascular resistance.

915

916 **INDICATIONS:**

917

918 Post-cardiothoracic surgery patients located on 7 West for management of pulmonary hypertension,  
919 right ventricular dysfunction, or refractory hypoxemia.

920

921 **PREPARATION/STORAGE/DISPENSING:**

922

- 923  Veletri syringes shall be prepared by the pharmacy sterile preparation cleanroom (SPC). Standard concentration of syringe is 1.5 mg/50 mL (30,000 ng/mL).

924

- 924  Prepared Veletri syringes shall be given a 7 days refrigerated beyond use dating.

925

- 925  A non-patient specific supply of syringes will be stored in the Omnicell controlled refrigerator in the "B"  
926 medication room on 7W. Only Respiratory Medications will be stored in this refrigerator.

927

- 928       □ To assure ongoing appropriate inventory management, respiratory therapists shall access the  
929       Veletri syringes by logging into the Omnicell cabinet and selecting the drug for removal each  
930       time.

931

932       **ADMINISTRATION GUIDELINES:**

933

934

935

936

937

938

939

940

941

942

943

944

945

946

947

948

949

950

951

952       **ASSESSMENT OF RESPONSE:**

953

954

955

956

The desired response to inhaled Veletri is a decrease in pulmonary artery pressure, improved hemodynamics, and/or improved arterial oxygenation.

957

958       **PRECAUTIONS AND SIDE EFFECTS:**

959

960

961

962

963

964

965

966

1. Inhaled Veletri has fewer adverse effects than intravenous administration.
2. Systemic effects such as hypotension, nausea, flushing, headache, and dizziness are rare except at very high doses. If hypotension should occur when initiated, stop the drug, reinitiate iNO and contact the ICU team.
3. Veletri has an alkaline pH, it can be an irritant when inhaled, causing severe coughing.
4. Abrupt withdrawal of inhaled Veletri can cause rebound pulmonary vasoconstriction and hypoxemia, but this is rare.

967

968       **EQUIPMENT:**

969

970

971

972

973

974

1. Medfusion 3500 Infusion pump
2. Aeroneb Pro-xcontrol unit, Aeroneb Pro-x nebulizer with T adapter, Aerogen Tubing Set
3. 50 mL Veletri syringe prepared by pharmacy
4. Hydroscopic filters to be placed between expiratory limb and ventilator exhalation filter) with Q4H change and PRN (for invasive ventilation)
5. Small syringe containing sterile saline solution

975

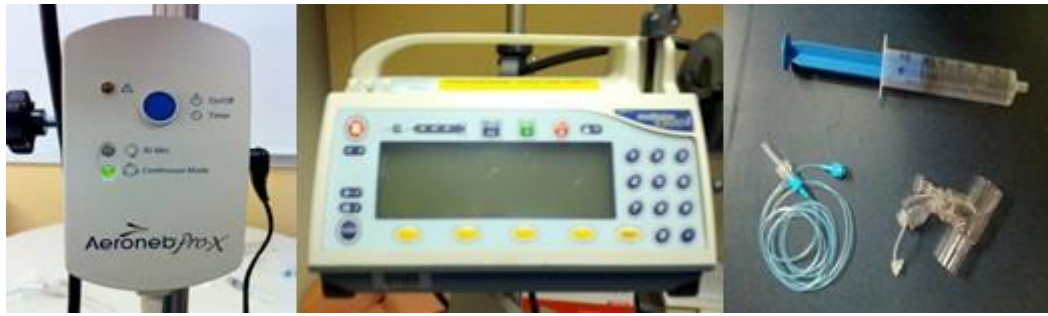

976  
977

**PRACTITIONER ROLES:**

978

979

**Nursing/Respiratory Therapy Considerations**

980

981

982

1. Any questions about the dose should be clarified with the pharmacist.

983

2. This therapy demands close collaboration between the respiratory therapist, nurse, and pharmacist.

984

985

3. Drug administration is documented in E-MAR, Respiratory Medication Administration flowsheet and noted in the shift note by the respiratory therapist.

986

987

988

4. Continuous oxygen saturation monitoring is required.

989

5. Standard unit-specific vital signs assessment is followed.

990

6. Aerosol delivery into the ventilator circuit or mask must be confirmed visually.

991

7. If the patient is receiving Veletri by face mask, assure that the mask is fitted comfortably and is only removed for short periods; monitor oxygen saturation closely when the mask is removed.

992

993

8. Care should be taken to avoid direct exposure to the aerosol emitted from the nebulizer.

994

995

9. Masks are not required when entering the room or when involved in usual caregiver activities in the room. However, N95 masks will be available for those who choose to use them.

996

997

998

10. Although evidence is lacking for exposure during pregnancy, it is recommended that women who are pregnant do not enter the room during treatment.

999

1000

1001

**EQUIPMENT SET-UP:**

1002

1003

1. Assure Aeroneb control unit is plugged into Uninterruptible Power Source (UPS).

1004

2. Assure that UPS and infusion pump are plugged into 110 volt AC power source.

1005

3. Place additional expiratory filter between expiratory limb and ventilator expiratory filter. (Q4H and prn change)

1006

1007

4. Confirm the dose in the E-MAR. A dose greater than 50 ng/kg/min will not be used. If there are concerns about spillover systemic hypotension, a lower starting dose (e.g., 30 ng/kg/min) should be used.

1008

1009

5. Scan the patient's ID band, scan barcode on syringe label, and look for Maestro Medication Administration window to appear.

1010

1011

6. Perform functional check of nebulizer.

1012

1013

- Inject 1 mL of sterile saline into nebulizer cup and t-piece assembly.
- Press and hold the On/Off power button for 3 seconds.

1014

1015

1016

1017

1018



- 1019
- 1020
- 1021
- 1022
- 1023
- 1024
- 1025
- 1026
- Verify that Continuous Mode indicator illuminates and aerosol is produced.
  - Allow nebulizer cup to empty.
7. Attach Aerogen tubing set to syringe containing Veletri solution. Attach the other end of the tubing to the luer connector for the nebulizer; this connector should be separate from the nebulizer assembly at this time.

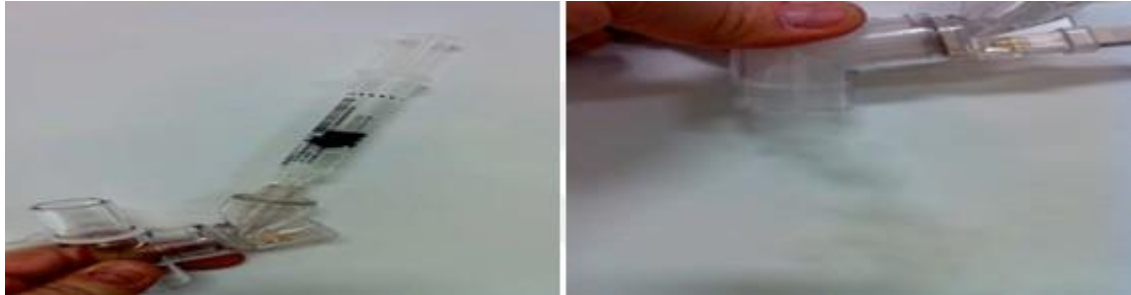

- 1027
- 1028 **Program Medfusion 3500 Infusion pump.**

- 1029
- 1030  Power pump on
- 1031

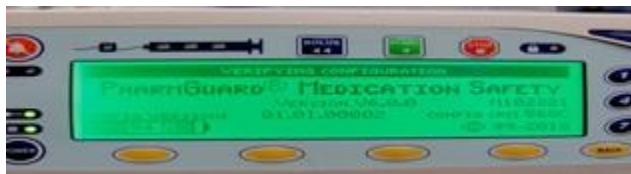

- 1032
- 1033  Select Respiratory Folder
- 1034

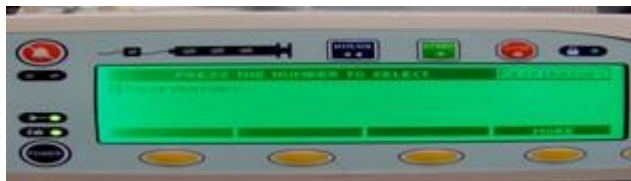

- 1035
- 1036  Select Epoprostenol Folder
- 1037

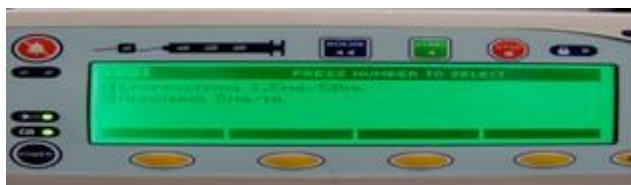

- 1038  Verify that the concentration printed on the syringe label is 1.5 mg/50mL and press "Yes".

1039

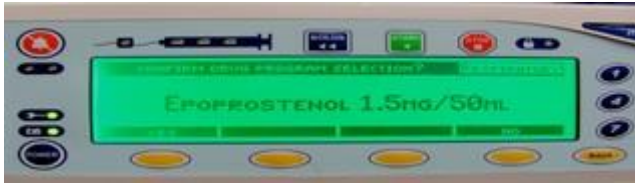

1040

- 1042  Choose B-D syringe.
- 1043  Place 60 mL syringe containing 50 mL Epoprostenol (Veletri) solution into infusion pump and
- 1044  press "Enter".
- 1045  Enter patient's ideal body weight (ideal body weight) in KG
- 1046

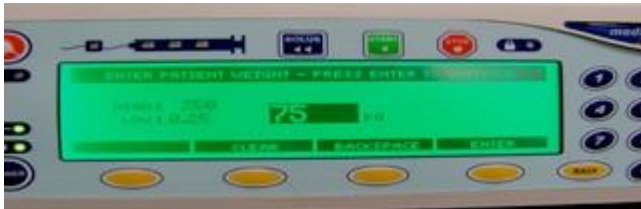

1047

- 1048  Enter starting dose 50 ng/kg/min as ordered
- 1049

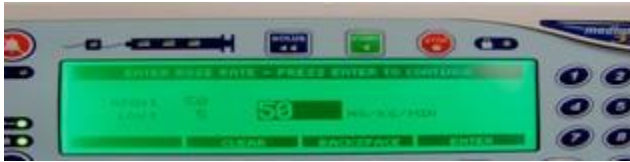

1050

- 1051  Prime the tubing by press and holding BOLUS until tubing is primed, (approximate priming
- 1052  volume 3.7 ccs')
- 1053  Confirm no "air" is in Aerogen tubing
- 1054

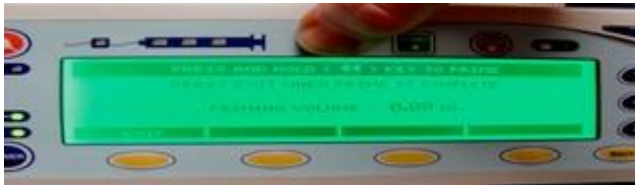

- 1055  The dose set on the pump will be confirmed by a second clinician (respiratory therapist or
- 1056  nurse).
- 1057  Attach tubing from Veletri syringe to nebulizer.
- 1058  Place Aeroneb nebulizer unit into T-piece.
- 1059  Attach cable between Aeroneb control unit and nebulizer
- 1060  Press START (green button) on pump to begin dose after nebulizer is in circuit. Observe
- 1061  nebulizer for aerosol production.

1062

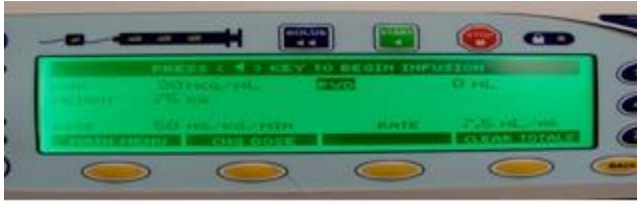

1063  
1064

- 1065  Response to therapy should be assessed after 30-60 minutes. Determination of criteria for
- 1066 response should be established by the clinical team before therapy is initiated. A general
- 1067 guideline is that there should be a 20% improvement in oxygenation or hemodynamics to
- 1068 continue therapy after 1 hour.
- 1069  Maximum dose is 50ng/kg/min. A lack of response at this dose level should prompt
- 1070 discontinuation of therapy
- 1071  If hypotension occurs, dose should be reduced.
- 1072  Dosage adjustments should be made in increments/decrements of 5 ng/kg/min.
- 1073  After 4 hours of clinical stability, consideration should be given to dose reduction.

1074  
1075 **Changing Dose:**

- 1076
- 1077  Select Change dose (ng/kg/min)
- 1078  Enter new dose, press start.

1079  
1080 **Syringe Change:**

- 1081
- 1082  The Veletri syringe is changed at least every 24 hrs or whenever the remaining volume in the
- 1083 syringe reaches 5 mL
- 1084  The connecting tubing and nebulizer only need to be changed every 7 days.
- 1085
  - 1086  (The syringe will need to be changed in less than 24 hrs when the infusion rate is greater
  - 1087 than 1.8 mL/hr).
- 1088
  - 1089 1. To change syringe press STOP
  - 1090 2. Remove tubing from nebulizer and close port
  - 1091 3. Remove syringe
  - 1092 4. Remove tubing from syringe and attach to new syringe
  - 1093 5. Place new syringe in pump and Prime tubing
  - 1094 6. Reattach tubing to nebulizer
  - 1095 7. Press START
  - 1096 8. Observe for delivery and aerosol production

1097  
1098  
1099  
1100  
1101 **Invasive ventilator assembly:**

- 1102
- 1103
  - 1104 1. Connect T-piece into circuit at humidifier inlet (dry side); be certain that nebulizer cup is upright.
  - 1105 2. Place disposable bacterial/viral filter before exhalation valve assembly.
    - Change the filter every 4 hrs and PRN if resistance to expiratory flow is noted.

1106  
1107  
1108  
1109

3. An active humidification system must be used. Do not use a Heat-Moisture Exchanger (HME) during administration of inhaled Veletri.

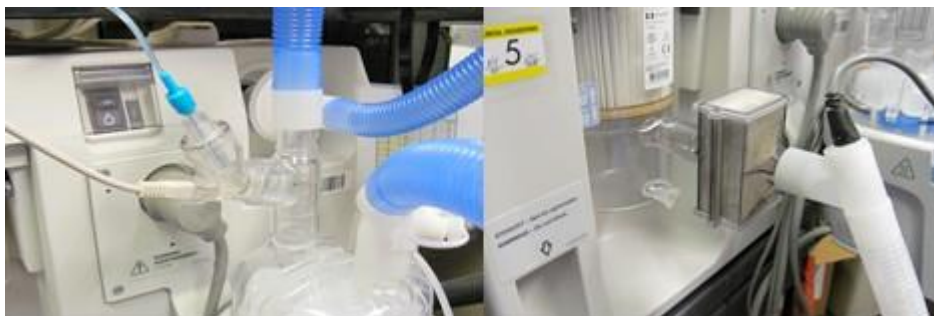

1110  
1111  
1112  
1113  
1114  
1115  
1116  
1117  
1118

**Transport Ventilator Assembly:**

1. Place filter on ventilator outlet port
2. Connect T-piece/aerogen assembly into filter outlet.
3. Insert Expiratory filter on limb
4. Be certain that nebulizer cup is upright.
5. Do not use a Heat-Moisture Exchanger (HME) during administration of inhaled Veletri.

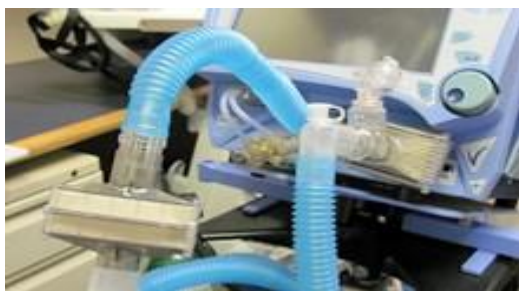

1119  
1120  
1121  
1122  
1123  
1124  
1125

**Noninvasive Ventilator Assembly:**

1. Use a non-vented mask.
2. Place the nebulizer between the leak port and the mask.
3. Be careful to position the mask so that the nebulizer cup remains in a vertical position.

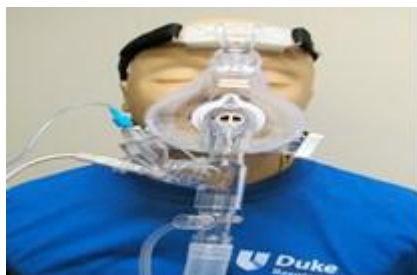

1126  
1127  
1128  
1129  
1130

**Mask Assembly:**

1. Attach Aerogen "Mask Adapter" to Aerosol Mask inlet

1131  
1132  
1133  
1134

2. Connect small bore O2 tubing to bottom inlet port of adapter
3. Place Aerogen nebulizer in Aerogen adapter

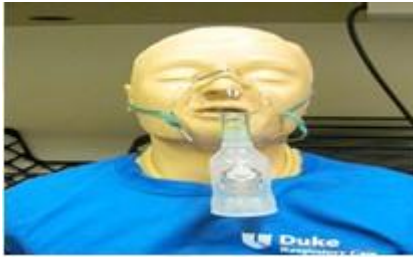

1135  
1136  
1137  
1138  
1139  
1140

#### High flow Nasal Cannula Assembly:

1. Connect T piece to humidifier inlet with the nebulizer cup in an upright, vertical position.
2. Connect high flow nasal cannula to the other end of T piece.
3. Adjust oxygen flow meter to desired flow rate (liters/minute)

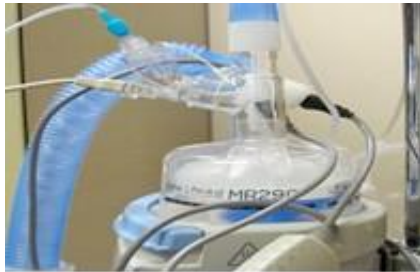

1141  
1142  
1143  
1144  
1145  
1146  
1147  
1148  
1149  
1150  
1151

#### Manual Ventilation Assembly:

1. For patients with an artificial airway, place the T piece between the manual ventilator (AMBU) outlet and the endotracheal or tracheostomy tube. Be certain that the nebulizer cup is in a vertical position.
2. If a non-intubated patient requires emergency ventilation, immediately initiate manual bag-valve-mask ventilation.
3. If emergency ventilation is needed, the first priority is adequate ventilation and oxygenation and the secondary priority is administration of aerosolized Veletri.

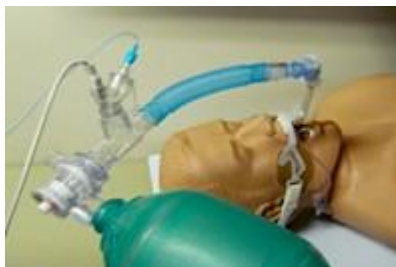

1152  
1153  
1154  
1155

#### Equipment Maintenance

1. Disposable hydroscopic filters are to be changed Q4h and prn.

1156

1157 2. Aeroneb nebulizer to be changed Q7 days and prn.

1158 3. Syringe line tubing to be changed Q7 days and prn.

1159

1160 **RECOMMENDED DOSING STRATEGIES:**

1161

1162 1. The usual dosage range is 5-50 ng/kg/min based on ideal body weight. Do not use a dose greater  
1163 than 50ng/kg/min.

1164 2. The usual starting dose of aerosolized Veletri is 50ng/kg/min.

1165 3. Dosage adjustments should be made in increments/decrements of 5ng/kg/min.

1166 4. The initial dose of 50ng/kg/min is at the upper end of the dose range used in most clinical  
1167 studies.

1168 5. Assess the response to therapy within 30-60 minutes of initiation.

1169 6. After 4 hours of clinical stability, consideration should be given to dose reduction.

1170 7. At high doses, there is a potential for systemic effects, which results in systemic hypotension.  
1171 There is a potential for rebound pulmonary vasoconstriction and hypoxemia when Veletri is  
1172 abruptly discontinued, but it is probably less than that for inhaled nitric oxide.

1173 8. Be prepared to increase the FIO2 and support hemodynamics during discontinuation. If rebound  
1174 occurs, it may be helpful to wean the dose slowly before discontinuation.

1175

1176

1177

1178

1179 **WEANING**

1180

1181 **GENERAL COMMENTS:** Right Heart hemodynamics include: SVO<sub>2</sub>, CO, CI, PA<sub>sys/dia</sub>, CVp. There is a  
1182 potential for rebound increase in pulmonary vasoconstriction and hypoxemia when Veletri is  
1183 abruptly discontinued. Weaning of Epoprostenol will commence following communication and  
1184 consent of the Provider team. Prior to each dosing change, Right Heart hemodynamics will be  
1185 assessed and documented in the comment section of the MAR for Epoprostenol by inhalation. In  
1186 general, the Right Heart parameters should meet the following criteria before weaning or  
1187 discontinuation: SvO<sub>2</sub> > 65, CVP < 15, CI > 2.2, and adequate oxygenation. Pulmonary arterial  
1188 pressure values will vary but should remain stable during weaning and trial off.

1189  
1190  
1191  
1192  
1193  
1194  
1195  
1196

**WEANING PROCEDURE:**

1. Obtain consent for weaning commencement from provider team.
2. The following decrement strategy will be used:

| Dose | Action                                                                                                                                  |
|------|-----------------------------------------------------------------------------------------------------------------------------------------|
| 50   | Dosage rate at start of wean                                                                                                            |
| 45   | Observe Right Heart hemodynamics and decrease dose to 45ng/kg/min only and allow stabilizing for 1 hour.                                |
| 35   | Observe Right Heart hemodynamics and decrease dose to 35ng/kg/min only and allow stabilizing for 1 hour.                                |
| 25   | Observe Right Heart hemodynamics and decrease dose to 25ng/kg/min only and allow stabilizing for 1 hour.                                |
| 15   | Observe Right Heart hemodynamics and decrease dose to 15ng/kg/min only and allow stabilizing for 1 hour.                                |
| Off  | If Right Heart hemodynamics are stable, notify Provider for Discontinue of Epoprostenol and observe for 1 hour before taking down setup |

1197  
1198  
1199  
1200  
1201  
1202  
1203  
1204  
1205  
1206

3. If rebound worsening of pulmonary hypertension, reduced SvO<sub>2</sub> < 65, increased cvp by more than 5 mm Hg or cvp value is > 15 mm Hg, reduced CI < 2.2, or hypoxemia occurs during any dosing decrease, return to last dose, and notify provider team. Provider may choose to resume wean in 1 hour or halt weaning at current dose until further discussion.

**DISCONTINUATION:**

1207  
1208  
1209  
1210  
1211  
1212  
1213

1. Once weaning protocol has been completed, notify the provider team of hemodynamic stability with Epoprostenol off after 1 hour.
2. If rebound worsening of pulmonary hypertension, reduced SvO<sub>2</sub> < 65, increased cvp by more than 5 mm Hg or cvp value is > 15 mm Hg, reduced CI < 2.2, or hypoxemia occurs during any dosing decrease, return to last dose, and notify provider team. Provider may choose to resume wean in 1 hour or halt weaning at current dose until further discussion.

**DOCUMENTATION**

1214  
1215  
1216  
1217  
1218  
1219

1. MAR documentation: Scan patient and scan medication. Enter dose and rate as delivered.
2. Respiratory Medication administration – Document continuous nebulizer on Respiratory Medication Administration flowsheet. Use this comment section for care notes.

**CAREGIVER PROTECTION CONCERNS:**

1220  
1221  
1222  
1223

1. **Toxicity:** Veletri has no known toxic effects or toxic metabolites.

- 1224
- 1225
- 1226
- 1227
- 1228
- 1229
- 1230
- 1231
- 1232
- 1233
- 1234
- 1235
- 1236
- 1237
- 1238
- 1239
- 1240
- 1241
- 1242
- 1243
- 1244
- 1245
- 1246
2. **Carcinogenesis, Mutagenesis, Impairment of Fertility:** Long-term studies in animals have not been performed to evaluate carcinogenic potential. A micronucleus test in rats revealed no evidence of mutagenicity. The Ames test and DNA elution tests were also negative, although the instability of Veletri makes the significance of these tests uncertain. Fertility was not impaired in rats given Veletri by subcutaneous injection at doses up to 2.5 times the recommended human dose.
  3. **Pregnancy:** Pregnancy Category B. Reproductive studies have been performed in pregnant rats and rabbits at doses up to 2.5 times the recommended human dose and have revealed no evidence of impaired fertility or harm **to the fetus** due to Veletri. There are, however, no adequate and well-controlled studies in pregnant women.
  4. **Recommendations:**
    - The patient should be in a single patient room, but it does not need to be a negative **pressure room** and the door does not need to remain closed.
    - A sign will be placed on the door to indicate that ***inhaled Veletri is being administered.***
    - Care should be taken to avoid direct exposure to the aerosol emitted from the nebulizer.
    - Masks are not required when entering the room or when involved in usual caregiver activities in the room, but N95 masks will be available for those who choose to use them.
    - Women who are pregnant should not enter the room during treatment.

1247 **Storage and Cleaning of System**

- 1248
- 1249
- 1250
- 1251
- 1252
- 1253
- 1254
1. Disposable equipment, (nebulizer, t-piece, syringe, syringe tubing) will be removed and discarded in the patient room upon termination of use.
  2. The administration system will be disinfected with “Sani-wipes” prior to removal from the patients’ room and placed in a designated RCS Equipment storage room for 7W.
  3. Administration systems will be plugged in to electrical outlets while in storage to maintain full battery charge.

1255

1256 **REFERENCES:**

- 1257
- 1258
- 1259
- 1260
- 1261
- 1262
- 1263
- 1264
- 1265
- 1266
- 1267
- 1268
- 1269
- 1270
1. Dahlem P, van Aalderen WM, de Neef M, Dijkgraaf MG, Bos AP. Randomized controlled trial of aerosolized prostacyclin therapy in children with acute lung injury. Crit Care Med 2004; 32(4):1055-60.
  2. Domenighetti G, Stricker H, Waldspuehl B. Nebulized prostacyclin (PGI<sub>2</sub>) in acute respiratory distress syndrome: impact of primary (pulmonary injury) and secondary (extrapulmonary injury) disease on gas exchange response. Crit Care Med 2001; 29(1):57-62.
  3. Lowson SM. Inhaled alternatives to nitric oxide. Crit Care Med 2005; 33(3 Suppl):S188-95.
  4. Meyer J, Theilmeier G, Van Aken H, Bone HG, Busse H, Waurick R, Hinder F, Booke M. Inhaled prostaglandin E1 for treatment of acute lung injury in severe multiple organ failure. Anesth Analg 1998; 86(4):753-8.
  5. Meyer J, Theilmeier G, Van Aken H, Bone HG, Busse H, Waurick R, Hinder F, Booke M. Inhaled prostaglandin E1 for treatment of acute lung injury in severe multiple organ failure. Anesth Analg 1998; 86(4):753-8.



1271

- 1272 6. Olschewski H, Ghofrani HA, Walrath D, Schermuly R, Temmesfeld-Wollbruck B, Grimminger F,  
1273 Seeger W. Inhaled prostacyclin and iloprost in severe pulmonary hypertension secondary to lung  
1274 fibrosis. *Am J Respir Crit Care Med* 1999; 160(2):600-7.
- 1275 7. Putensen C, Hormann C, Kleinsasser A, Putensen-Himmer G. Cardiopulmonary effects of  
1276 aerosolized prostaglandin E1 and nitric oxide inhalation in patients with acute respiratory  
1277 distress syndrome. *Am J Respir Crit Care Med* 1998; 157(6 Pt 1):1743-7.
- 1278 8. Siobal M. Aerosolized prostacyclins. *Respir Care* 2004; 49(6):640-52.
- 1279 9. Siobal MS, Kallet RH, Pittet JF, Warnecke EL, Kraemer RW, Venkayya RV, Tang JF. Description and  
1280 evaluation of a delivery system for aerosolized prostacyclin. *Respir Care* 2003; 48(8):742-53.
- 1281 10. van Heerden PV, Barden A, Michalopoulos N, Bulsara MK, Roberts BL. Dose-response to inhaled  
1282 aerosolized prostacyclin for hypoxemia due to ARDS. *Chest* 2000; 117(3):819-27.
- 1283 11. Afshari A, Brok J, Moller AM, Wetterslev J. Aerosolized prostacyclin for acute lung injury (ALI)  
1284 and acute respiratory distress syndrome (ARDS). *Cochrane Database Syst Rev* 2010; (8):  
1285 CD007733.
- 1286 12. Siobal MS, Hess DR. Are inhaled vasodilators useful in acute lung injury and acute respiratory  
1287 distress syndrome? *Respir Care* 2010; 55(2): 144-57; discussion 157-61.
- 1288 13. Khan TA, Schnickel G, Ross D, et al. A prospective, randomized, crossover pilot study of inhaled  
1289 nitric oxide versus inhaled prostacyclin in heart and lung transplant recipients. *J Thorac  
1290 Cardiovasc Surg* 2009; 138(6): 1417-24.

1291

1292

#### REFERENCES

1293 Transport of the Mechanically Ventilated CardioThoracic Patient on inhaled Nitric Oxide or inhaled  
1294 Epoprostenol

1295

1296

1297

1298

1299  This policy sets forth the standards for transporting the mechanically ventilated cardiothoracic  
1300 patient on inhaled nitric oxide (iNO) or inhaled Epoprostenol (iEPO) within Duke University  
1301 Hospital by respiratory care practitioners.

1302  Patient transport includes patient preparation, movement to and from the ICU, a diagnostic  
1303 suite, Operating room, and time spent at the destination.

1304  For transport, a mechanical ventilator designed for transport and the Pulmonary Vasodilator  
1305 system in use (iEpo, iNO), will be utilized.

1306  ETCO<sub>2</sub> will be monitored during all transports of mechanically ventilated patients.

1307  All mechanically ventilated patients will be accompanied during transit by a respiratory care  
1308 practitioner (RCP).

1309  If the patient is scheduled to undergo a procedure in the operating suite, the RCP may return to  
1310 his/her assigned area after verbal hand off with the Attending Anesthesiologist.

1311

#### 1312 **Description**

1313

1314  Mechanically ventilated patients on inhaled pulmonary vasodilators are transported within the  
1315 hospital for diagnostic or therapeutic procedures that cannot be performed in an in-patient unit.  
1316 To insure patient safety, respiratory care practitioners will make every effort to provide and  
1317 maintain an appropriate and constant level of ventilation, oxygenation, and pulmonary  
1318 vasodilator delivery during transport.

1319  The RCP will assess the patient's airway, ventilation and oxygen status prior to the transport. If  
1320 the patient is hemodynamically unstable or if difficulty maintaining the patient's ventilation or  
1321 oxygenation status is anticipated during transport, the RCP will voice these concerns to the  
1322 medical team.

1323

1324 **Indications**

1325

- 1326  Transport of all patients using Respiratory Care owned equipment must be accompanied by a  
1327 Respiratory Care Practitioner.

1328

1329 **Hazards and Complications**

1330

- 1331  Hyperventilation during manual ventilation may lead to respiratory alkalosis, cardiac  
1332 dysrhythmia, hypotension, and decreased cerebral perfusion.
- 1333  Loss of PEEP/CPAP may result in hypoxemia and decreased oxygen delivery.
- 1334  Disruption of inhaled pulmonary vasodilator may cause rebound pulmonary hypertension  
1335 and/or hypoxemia.
- 1336  Position changes may result in hypotension, hypercarbia, hypoxemia and loss of the airway.  
1337  Movement may cause disconnection from ventilator support.  
1338  Movement may result in accidental extubation.
- 1339  Tachycardia and other dysrhythmias have been associated with transport.
- 1340  Equipment failure can result in inaccurate data or loss of monitoring capabilities.
- 1341  Loss of oxygen supply may lead to hypoxemia.

1342

1343 **Contraindications**

1344

- 1345  Inability to provide adequate oxygenation and ventilation during transport either by manual  
1346 ventilation or mechanical ventilation.
- 1347  Inability to maintain acceptable hemodynamic performance during transport.
- 1348  Inability to adequately monitor the patient's cardiopulmonary status during transport.
- 1349  Inability to maintain airway control during transport.
- 1350  Transport should not be undertaken unless all the necessary members of the transport team are  
1351 present.

1352

1353 **Respiratory Care Resources**

1354

1355 A manual resuscitator with in-line pressure manometer, PEEP valve, and mask must accompany the  
1356 patient during transport.

1357 iNOMAX DSir

1358 Medfusion 3500

1359 Aerogen Aereoneb

1360 Portable oxygen supply ['e' cylinder(s)] of adequate volume.

1361 Viasys Vela Transport ventilator and patient circuit.

1362

1363

1364 **Procedure**

1365

- 1366  The RCP will gather all required respiratory care resources and bring the equipment to the  
1367 bedside.

- 1368 □ The RCP will set-up and test the transport ventilator according to department procedure.  
 1369 \* May use Vela Pole mount system or Stand Alone pole on wheels for Aerogen/Medfusion system.
- 1370 □ The RCP will place in line the Pulmonary Vasodilator system in use per department guidelines.  
 1371 ○ iNO Transport  
 1372     ▪ Ensure adequate supply of gas (>1000 psi)  
 1373     ▪ No HME in line  
 1374     ▪ Injector Module and sampling line inserted per departmental guidelines  
 1375 ○ iEpo  
 1376     ▪ Ensure adequate supply of Epoprostenol (minimum 30 cc's)  
 1377     ▪ No HME in line  
 1378     ▪ Nebulizer placed post filter on inspiratory limb  
 1379     ▪ Expiratory filter in place  
 1380     ▪ \* May use Vela Pole mount system or Stand Alone system on wheels.
- 1381 □ The RCP will adjust the transport ventilator to provide an adequate level of ventilatory support  
 1382 ○ The RCP should duplicate the patient's existing ventilator settings whenever possible.  
 1383 ○ The RCP will insure that an appropriate respiratory rate is set (minute ventilation)  
 1384 whenever sedation may be administered during the transport procedure to avoid  
 1385 hypoventilation, hypercapnia, and hypoxemia.
- 1386 □ The RCP will ensure the airway is secure and in proper position before leaving the unit.  
 1387 ○ The RCP will monitor the patient during transport to insure artificial airway stability and  
 1388 patency.
- 1389 □ Prior to leaving the unit the RCP will assess the transport ventilator's ability to provide an  
 1390 adequate level of ventilation support by observing the monitored  
 1391 ○ Exhaled tidal volume  
 1392 ○ Minute volume  
 1393 ○ Respiratory rate.  
 1394 ○ SpO2  
 1395 ○ ETCO2
- 1396 □ On arrival to destination, the RCP will review all above monitored parameters and verify stability  
 1397 of values and system.
- 1398 □ If the patient is scheduled to undergo a procedure in the operating suite, the RCP may return to  
 1399 his/her assigned area after verbal hand off with the Attending Anesthesiologist.  
 1400 ○ Hand off will include a review of the pulmonary vasodilator system in use, the  
 1401 mechanical ventilator, and the procedure for ordering inhaled epoprostenol from OR  
 1402 pharmacy.  
 1403 ○ The RCP will provide the Anesthesiology team with his/her pager/phone number so that  
 1404 he/she may be contacted.
- 1405 □ Documentation of transport will be done in the EMAR per department standards.

1406  
 1407  
 1408  
 1409  
 1410  
 1411  
 1412  
 1413  
 1414  
 1415  
 1416  
 1417  
 1418

1419  
1420

## **REFERENCES**

- 1421 1. AARC Clinical Practice Guideline: In-Hospital Transport of the Mechanically Ventilated Patient –  
1422 2002 Revision and Update. Resp Care 2002; 47(7):721-723

1423

## OR Support for Epoprostenol

1424 The use of inhaled Epoprostenol is moving forward into the OR. We have supported 5 cases thus  
1425 far and an additional 2 cases that were on inhaled epoprostenol and required to return to the OR.  
1426 To continue this support, please note the following and contact a supervisor or J Cappiello when  
1427 inhaled epoprostenol in the OR is requested.

1428

1429

### New OR Case requiring Epoprostenol

1430

1. Contact Supervisor/J Cappiello to obtain F&P heater
- 1431 2. Obtain Medfusion/Aerogen delivery unit, 3 Aerogen nebulizers, circuit tee and infusion  
1432 tubing, heated wire circuit, and 1 L sterile water for humidification.
- 1433 3. Proceed to OR requesting unit.
- 1434 4. Place Unit between OR bed and anesthesia machine and set up circuit from anesthesia  
1435 inspiratory port, to humidifier, to patient and return to exhalation port, (as in the PB840).
- 1436 5. Inform Anesthesia to place order for Epoprostenol Inhalation
- 1437 6. If Epoprostenol available, set up syringe pump assembly. If Epoprostenol not available,  
1438 instruct anesthesia to call when Epo is available.
- 1439 7. Review circuit, delivery system, how to monitor neb, troubleshooting and dosing (IBW)  
1440 with Anesthesia.
- 1441 8. HME may be used until Epo and Humidity is initiated.
- 1442 9. Provide Anesthesia with RCS contact phone number and request to be called for Epo  
1443 initiation
- 1444 10. Transport of this patient from the OR will occur with a transport ventilator  
1445

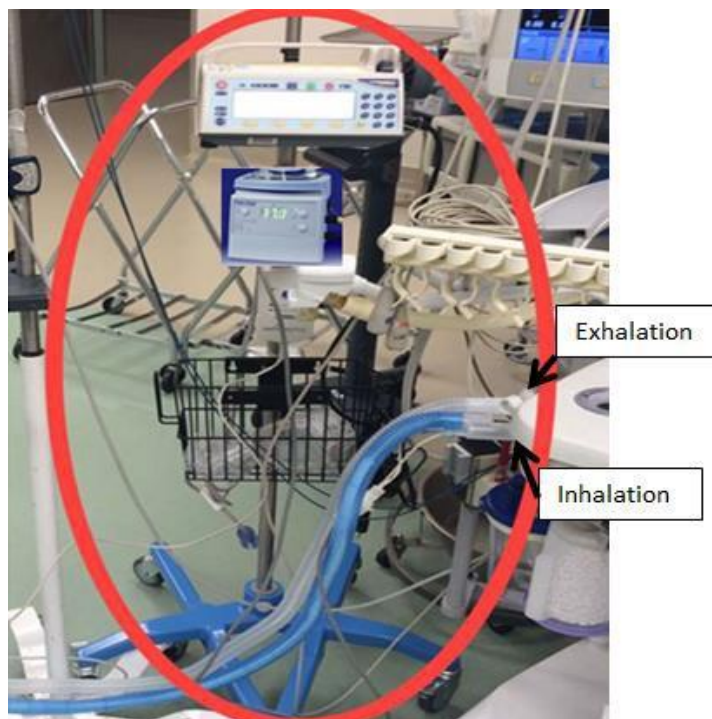

1446  
1447  
1448  
1449  
1450  
1451  
1452  
1453  
1454  
1455  
1456  
1457  
1458  
1459  
1460  
1461  
1462

### Return to OR from CTICU on Epoprostenol

1. Contact Supervisor/J Cappiello
2. Consult with Anesthesia for duration of case and intra-operative ventilation plans
3. Place patient on transport ventilator with inhaled epo as per policy. No HME
4. Place two additional nebulizers in delivery unit basket
5. Ensure Epoprostenol volume is 40 cc or greater
6. Transport patient to OR on transport ventilator
7. Review delivery system, how to monitor, trouble shooting and dosing (IBW) with Anesthesia team
8. If transport ventilator will be used for the case, review ventilator with Anesthesia team. No HME.
9. Provide Anesthesia with RCS contact phone number
10. Transport of this patient from the OR will occur with a transport ventilator

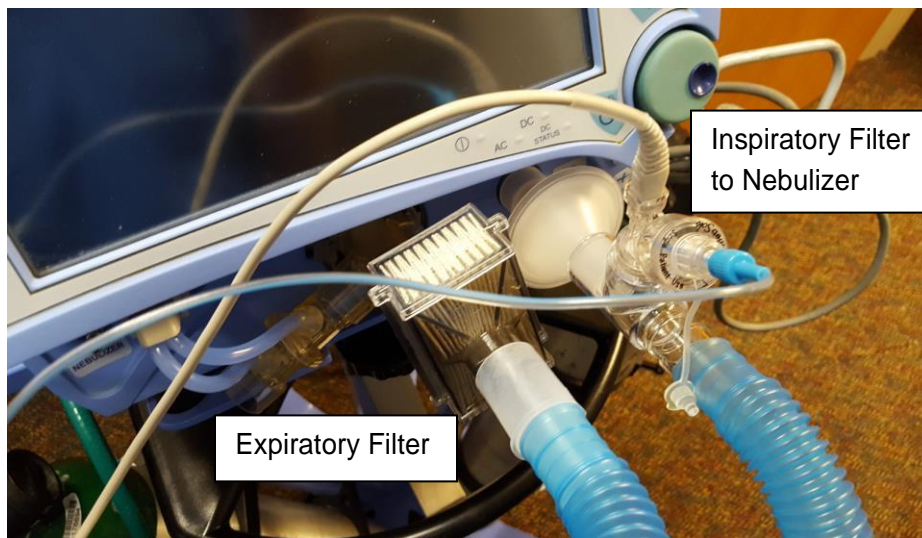

1463  
1464 Inhaled Nitric Oxide Protocol for the Adult Lung Transplant Patient in the Cardiothoracic Intensive Care  
1465 Unit  
1466  
1467 This protocol sets forth the standards for the use of inhaled nitric oxide (iNO) for the Lung Transplant  
1468 Patient in the Adult Cardiothoracic Intensive Care Unit (CTICU) by Respiratory Care Practitioners.  
1469  
1470 **PATIENT POPULATION:**  
1471  
1472 Lung Transplant patients receiving inhaled Nitric Oxide (iNO) for pulmonary vasodilator therapy.  
1473  
1474 **DESCRIPTION:**  
1475  
1476 iNO (nitric oxide gas) is an odorless, colorless gas administered by inhalation. Nitric oxide, the active  
1477 substance in iNO, is a vasodilator and when inhaled, vasodilation is limited to the pulmonary  
1478 vasculature.  
1479  
1480 **INDICATIONS:**  
1481  
1482 Lung transplant patients located on 7 West for the management of pulmonary hypertension, right  
1483 ventricular dysfunction, or refractory hypoxemia.  
1484  
1485 **ASSESSMENT OF RESPONSE:**  
1486  
1487 The desired response to iNO is a decrease in pulmonary artery pressure, improved hemodynamics,  
1488 and/or improved arterial oxygenation.



1489

1490 **PRECAUTIONS AND SIDE EFFECTS:**

1491

1492 Hypoxemia secondary to Methemoglobinemia

1493

1494 Airway inflammation due to elevated  $\text{NO}_2 > 1.5 \text{ PPM}$ .  $\text{NO}_2$  is a nitric oxide byproduct - not to be mistaken  
1495 with nitrous oxide ( $\text{N}_2\text{O}$ ), an anesthetic gas).

1496

1497 **EQUIPMENT:**

1498

1499 INOmax DS IR

1500

1501 **PROCEDURE and DOSING STRATEGIES**

1502

1503  The RCP will follow established departmental standards per INOmax DS IR policy for set up and  
1504 administration.

1505  INO therapy will be administered on provider order.

1506  The dose range is 0.5-20 PPM with the usual starting dose of 20 PPM.

1507  INO therapy will be administered by the INOmax® DS IR system with the following equipment:

1508  Viasys Avea

1509  Puritan Bennett 840

1510  Viasys Vela

1511  SensorMedics 3100B

1512  Optiflo Humidification System

1513  Nasal cannula

1514  Incremental dose adjustments should be done by doubling current dose (not to exceed 20 PPM).  
1515 Decrements should be done by halving the current dose.

1516  The following parameters will be monitored to assess dose response:  $\text{PA}_{\text{sys}}$ ,  $\text{PA}_{\text{dias}}$ ,  $\text{PA}_{\text{mean}}$ , CVP,  
1517 CI,  $\text{PO}_x$ ,  $\text{SVO}_2$

1518  iNO can be administered during invasive or noninvasive ventilation, Nasal Cannula, and High  
1519 Flow Humidity delivery.

1520

1521 **DOCUMENTATION**

1522  Performed twice a shift and at each dosing change to include:

1523  NO Dose set

1524  NO Dose monitored

1525   $\text{NO}_2$  monitored

1526  Right Heart hemodynamic parameters,  $\text{SVO}_2$ , Pulse Oximetry

1527  Tank pressure

1528  Weaning will follow below guidelines.

1529  
 1530  
 1531  
 1532  
 1533  
 1534  
 1535  
 1536  
 1537  
 1538  
 1539  
 1540  
 1541  
 1542  
 1543  
 1544  
 1545  
 1546  
 1547  
 1548  
 1549  
 1550  
 1551  
 1552  
 1553  
 1554  
 1555  
 1556  
 1557  
 1558

**WEANING**

**GENERAL COMMENTS:** Right Heart hemodynamics include: SVO<sub>2</sub>, CI, PA<sub>sys/dia</sub>, CVP. There is a potential for rebound increase in pulmonary vasoconstriction and hypoxemia when iNO is abruptly discontinued. Weaning of iNO will commence following communication and consent of the Provider team. Prior to each dosing change, Right Heart hemodynamics will be assessed and documented in the comment section of the Nitric Flowsheet. In general, the Right Heart parameters should meet the following criteria before weaning or discontinuation: SvO<sub>2</sub> > 60, CVP < 15, CI > 2.0, and adequate oxygenation. Pulmonary arterial pressure values will vary but should remain stable during weaning and trial off.

1. Obtain consent for weaning commencement from provider team.
2. Initiate weaning if non-ECMO, stable 2 hours post-op and no bleeding (chest tube output < 100 cc/hr) and hemodynamically stable. Reassess every 2 hours.
3. After initiation of weaning, one or more of the following conditions warrant a return to the last dose and notification of the provider team. Provider may choose to resume wean in 1 hour or halt weaning at current dose until further discussion.
  - PF ratio 200 or less
  - PaO<sub>2</sub> < 70 mmHg
  - FiO<sub>2</sub> > 0.40
  - pulmonary hypertension (MPAP > 30 mmHg)
  - reduced SvO<sub>2</sub> < 60 %
  - increased CVP by more than 5 mm Hg or CVP value is > 15 mm Hg
  - reduced CI < 2.0 during any dosing decrease

| Set Dose | Action                                                                                                                                     |
|----------|--------------------------------------------------------------------------------------------------------------------------------------------|
| 20       | Dosage rate at start of wean                                                                                                               |
| 10       | Observe Right Heart hemodynamics/oxygenation and decrease dose to 10 ppm only and allow stabilizing for 60 min.                            |
| 5        | Observe Right Heart hemodynamics/oxygenation and decrease dose to 5 ppm only and allow stabilizing for 60 min.                             |
| 1        | Observe Right Heart hemodynamics/oxygenation and decrease dose to 1 ppm only and allow stabilizing for 60 min.                             |
| 0.5      | Observe Right Heart hemodynamics/oxygenation and decrease dose to 0.5 ppm only and allow stabilizing for 60 min.                           |
| Off      | If Right Heart hemodynamics/oxygenation are stable, notify Provider for Discontinue of iNO and observe for 60 min before taking down setup |

1559

1560

**DISCONTINUATION:**

1561

1562

1. Once weaning protocol has been completed, notify the provider team of hemodynamic stability with iNO off after 1 hour.

1563

1564

1565

2. If rebound worsening of pulmonary hypertension, reduced SvO<sub>2</sub> < 60, increased CVP by more than 5mmHg or CVP value is > 15 mmHg, reduced CI < 2.0, or hypoxemia occurs during any dosing decrease, return to last administered dose, and notify provider team. Provider may choose to resume wean in 1 hour or halt weaning at current dose until further discussion.

1566

1567

1568

1569

1570

**REFERENCES**

1571  
1572 Inhaled Epoprostenol Protocol for the Adult Lung Transplant Patient in the Cardiothoracic Intensive Care  
1573 Unit  
1574  
1575  
1576 This protocol sets forth the standards for the use of inhaled epoprostenol (iEPO) for the Lung Transplant  
1577 Patient in the Adult Cardiothoracic Intensive Care Unit (CTICU) by Respiratory Care Practitioners.  
1578  
1579 **PATIENT POPULATION:**  
1580  
1581 Lung Transplant patients receiving inhaled epoprostenol (iEPO) for pulmonary vasodilator therapy.  
1582  
1583 **DESCRIPTION:**  
1584  
1585 Epoprostenol (Veletri) is a naturally occurring prostaglandin that serves as a potent vasodilator and is an  
1586 effective inhibitor of platelet aggregation. Aerosolized epoprostenol is used as a selective pulmonary  
1587 vasodilator when administered by inhalation, it has been shown to improve oxygenation, reduce  
1588 pulmonary shunt, lower pulmonary artery pressure and pulmonary vascular resistance.  
1589  
1590 **INDICATIONS:**  
1591  
1592 Lung transplant patients located on 7 West for the management of pulmonary hypertension, right  
1593 ventricular dysfunction, or refractory hypoxemia.  
1594  
1595 **ASSESSMENT OF RESPONSE:**  
1596  
1597 The desired response to iEPO is a decrease in pulmonary artery pressure, improved hemodynamics, and/  
1598 or improved arterial oxygenation.

1599

1600 **PRECAUTIONS AND SIDE EFFECTS:**

1601

- 1602  IEPO has fewer adverse effects than intravenous administration.
- 1603  Systemic effects such as hypotension, nausea, flushing, headache, and dizziness are rare except
- 1604 at very high doses. If hypotension should occur when initiated, immediately change to a lower
- 1605 dose.
- 1606  IEPO has an alkaline pH, it can be an irritant when inhaled, causing severe coughing.
- 1607  Abrupt withdrawal of iEPO can cause rebound pulmonary vasoconstriction and hypoxemia, but
- 1608 this is rare.

1609

1610 **EQUIPMENT:**

1611

- 1612  Medfusion 3500 Infusion pump
- 1613  Aeroneb Pro-xcontrol unit, Aeroneb Pro-x nebulizer with T adapter, Aerogen Tubing Set
- 1614  50mL Epoprostenol syringe prepared by pharmacy
- 1615  Hydroscopic filters to be placed between expiratory limb and ventilator exhalation filter with
- 1616 Q4H and PRN change (for invasive ventilation)

1617

1618 **PROCEDURE and DOSING STRATEGIES**

1619

- 1620  The RCP will follow established departmental standards per Epoprostenol policy for set up and
- 1621 administration.
- 1622  The usual dosage range is 5-50 ng/kg/min based on ideal body weight. Do not use a dose greater
- 1623 than 50ng/kg/min.
- 1624  The usual starting dose of iEPO is 50ng/kg/min.
- 1625  Dosage adjustments should be made in increments/decrements according to the weaning
- 1626 protocol outlined below.
- 1627  The initial dose of 50ng/kg/min is at the upper end of the dose range used in most clinical
- 1628 studies.
- 1629  Assess the response to therapy within 30-60 minutes of initiation.
- 1630  After 4 hours of clinical stability, consideration should be given to dose reduction.
- 1631  At high doses, there is a potential for systemic effects, which results in systemic hypotension. If
- 1632 this is suspected, the dose should be lowered.
- 1633  There is a potential for rebound pulmonary vasoconstriction and hypoxemia when iEPO is
- 1634 abruptly discontinued, but it is probably less than that for inhaled nitric oxide.
- 1635  Be prepared to increase the FIO2 and support hemodynamics during discontinuation. If rebound
- 1636 occurs, it may be helpful to wean the dose slowly before discontinuation.
- 1637  IEPO therapy can be administered through the following equipment:
- 1638
  - o Viasys Avea
- 1639
  - o Puritan Bennett 840
- 1640
  - o Viasys Vela
- 1641
  - o V60
- 1642
  - o Optiflo Humidification System
- 1643
  - o Nasal cannula

- 1644
- 1645           ○ Venturi Mask
- 1646       □ The following parameters will be monitored to assess dose response: PA<sub>sys</sub>, PA<sub>dias</sub>, PA<sub>mean</sub>, CVP,
- 1647           CI, PO<sub>x</sub>, SVO<sub>2</sub>

1648   **DOCUMENTATION**

- 1649       □ A Respiratory Care Assessment and type of medication administration will be documented
- 1650           twice a shift
- 1651       □ eMAR documentation will occur at each syringe change and at each dosing change.
- 1652           ○ Right Heart hemodynamic parameters, SVO<sub>2</sub>, Pulse Oximetry will be entered into the
- 1653           comment section

1654   **WEANING**

1656           **GENERAL COMMENTS:** Right Heart hemodynamics include: SVO<sub>2</sub>, CI, PA<sub>sys/dias</sub>, CVP. There is a

1657           potential for rebound increase in pulmonary vasoconstriction and hypoxemia when iEPO is abruptly

1658           discontinued. Weaning of iEPO will commence following communication and consent of the Provider

1659           team. Prior to each dosing change, Right Heart hemodynamics will be assessed and documented in the

1660           comment section of the eMAR. In general, the Right Heart parameters should meet the following criteria

1661           before weaning or discontinuation: SvO<sub>2</sub> > 60, CVP < 15, CI > 2.0, and adequate oxygenation. Pulmonary

1662           arterial pressure values will vary but should remain stable during weaning and trial off.

- 1664
- 1665           1. Obtain consent for weaning commencement from provider team.
- 1666           2. Initiate weaning if non-ECMO, stable 2 hours post-op and no bleeding (chest tube output <
- 1667           100 cc/hr) and hemodynamically stable. Reassess every 2 hours.
- 1668           3. After initiation of weaning, one or more of the following conditions warrant a return to the
- 1669           last dose and notification of the provider team. Provider may choose to resume wean in 1
- 1670           hour or halt weaning at current dose until further discussion.
- 1671                   □ PF ratio 200 or less
- 1672                   □ PaO<sub>2</sub> < 70 mmHg
- 1673                   □ FiO<sub>2</sub> > 0.40
- 1674                   □ pulmonary hypertension (MPAP > 30 mmHg)
- 1675                   □ reduced SvO<sub>2</sub> < 60 %
- 1676                   □ increased CVP by more than 5 mm Hg or CVP value is > 15 mm Hg
- 1677                   □ reduced CI < 2.0 during any dosing decrease

1678  
1679  
1680  
1681

| Set Dose | Action                                                                                                                                  |
|----------|-----------------------------------------------------------------------------------------------------------------------------------------|
| 50       | Dosage rate at start of wean                                                                                                            |
| 45       | Observe Right Heart hemodynamics and decrease dose to 45ng/kg/min only and allow stabilizing for 1 hour.                                |
| 35       | Observe Right Heart hemodynamics and decrease dose to 35ng/kg/min only and allow stabilizing for 1 hour.                                |
| 25       | Observe Right Heart hemodynamics and decrease dose to 25ng/kg/min only and allow stabilizing for 1 hour.                                |
| 15       | Observe Right Heart hemodynamics and decrease dose to 15ng/kg/min only and allow stabilizing for 1 hour.                                |
| Off      | If Right Heart hemodynamics are stable, notify Provider for Discontinue of Epoprostenol and observe for 1 hour before taking down setup |

1682

**DISCONTINUATION:**

1683

1684

1685

1686

1687

1688

1689

1690

1691

1. Once weaning protocol has been completed, notify the provider team of hemodynamic stability with iEPO off after 1 hour.
2. If rebound worsening of pulmonary hypertension, reduced SvO<sub>2</sub> < 60, increased CVP by more than 5mmHg or CVP value is > 15 mmHg, reduced CI < 2.0, or hypoxemia occurs during any dosing decrease, return to last administered dose, and notify provider team. Provider may choose to resume wean in 1 hour or halt weaning at current dose until further discussion.

1692

1693

**REFERENCES**

1694

1695 **Primary study objectives**

1696 Evaluate iNO and iEPO in order to determine if they have similar impact on clinical outcomes in end-  
1697 stage lung disease patients undergoing lung transplantation and end-stage heart failure patients  
1698 undergoing LVAD implantation or heart transplantation.

1699 Perform a cost analysis to evaluate the average per-patient cost to use each drug.

1700 **Sub-Study**

1701 The purpose of this sub-study is to understand the role of RV muscle bioenergetics using targeted  
1702 metabolite profiling, which include acylcarnitines, amino acids, and ceramides, in order to (i) identify the  
1703 pathway through which iPVD therapy improves outcomes and affects RV mitochondrial fatty acid  
1704 utilization, and (ii) identify plasma metabolites that predict responsiveness to iPVD therapy.

1705 **Secondary study objectives**

1706 **Sub-Study**

1707 1. Circulating metabolic biomarkers will identify heterogeneity of response to iPVD therapy, by reporting  
1708 on this underlying RV muscle's mitochondrial fatty acid utilization for energy production.

1709

1710

1711 **Standard Research Summary**

1712 **Purpose of the Study**

1713 **Objectives & hypotheses to be tested**

1714 1. Aim I – Clinical Trial Investigation. In order to utilize Inhaled Epoprostenol (iEPO, Veletri®, Actelion  
1715 Pharmaceuticals, South San Francisco, CA, USA) as an acceptable alternative to Nitric Oxide  
1716 (iNO, INOMAX®, Mallinkrodt Pharmaceuticals, St. Louis, MO, USA) in adult patients, we  
1717 propose a randomized, prospective, double-blinded trial in the cardiothoracic surgical  
1718 population, which will evaluate the primary hypothesis that these two medications will have  
1719 similar efficacy in pulmonary vasodilation and a similar impact on clinical outcomes in end-  
1720 stage lung disease patients undergoing lung transplantation and end-stage heart failure  
1721 patients under durable LVAD implantation or heart transplantation (Table 1).

1722 2. Aim II – Cost-Capture Analysis. There will be a parallel prospective cost-capture analysis designed to  
1723 precisely acquire the expenses that each drug incurs per patient averaged across all patients  
1724 randomized to that drug.

1725

1726

1727 **Sub-Study**

1728 Central hypothesis - Patients who are refractory to changes in pulmonary vascular tone after iPVD  
1729 therapy will also display reduced right ventricular (RV) mitochondrial fatty acid  
1730 utilization through increased lipid infiltration of right heart muscle.

1731

1732

1733

1734



1735

1736 2. Secondary Hypothesis - Circulating metabolic biomarkers will identify heterogeneity of response to  
1737 iPVD therapy, by reporting on this underlying RV mitochondrial fatty acid  
1738 utilization.

1739

1740

## 1741 **Background & Significance**

1742 *Introduction.* Inhaled Nitric Oxide (iNO) is a selective pulmonary vasodilator (PVD) with FDA-approval in  
1743 the neonatal population alone. In adult patients, iNO is used off-label to treat pulmonary hypertension,  
1744 right ventricular (RV) failure, and ventilation-to-perfusion mismatch. Adult patients who undergo  
1745 durable LVAD implantation (e.g. Heartware®, Heartmate 2®, or Heartmate 3®) or cardiac transplantation  
1746 for end-stage heart failure or those that have endured lung transplantation as a result of end-stage lung  
1747 disease, compose the largest subpopulation which receives PVD therapy at Duke University Hospital.  
1748 Intravenous Epoprostenol is FDA approved for adult patients with pulmonary hypertension and is the  
1749 only agent which has displayed mortality benefit in these patients. The inhaled formulation of  
1750 Epoprostenol (iEPO) was developed in order to maintain efficacy and avoid the systemic side effects of  
1751 vasodilation and thrombocytopenia. Inhaled iEPO is used off-label in our cardiothoracic surgical patients  
1752 for new-onset perioperative pulmonary arterial hypertension (PAH), known preoperative PAH, RV  
1753 dysfunction with LVEF > 35-40%, and promotion of ventilation to perfusion matching through alveolar  
1754 deposition of the prostanoid compound and vasodilation of the intimately associated intra-acinar  
1755 pulmonary arteries. This vasodilation can decrease pulmonary vascular resistance and can improve  
1756 oxygenation while avoiding systemic effects commonly seen in the intravenous formulation. iEPO has  
1757 been introduced in the cardiothoracic operating rooms (OR) and ICU as a cost-conscious alternative  
1758 medication to iNO. iEPO may display an equivalent efficacy profile to iNO for pulmonary vasodilation  
1759 and oxygenation and have a similar impact on clinical outcomes. For the purposes of this writing,  
1760 thoracic transplantation will refer to both heart and lung transplantation.

1761 *Pharmacology.* There are 3 major pathways that affect pulmonary vascular tone: 1) Nitric oxide  
1762 (vasodilatory), 2) Prostaglandin (vasodilatory), and 3) Endothelin (vasoconstrictive) pathways. During  
1763 cardiothoracic operations, particularly transplantation and LVAD surgery, there is an appreciable  
1764 imbalance in these pathways, which favors vasoconstriction. iNO administration, exerts its mechanism  
1765 of pulmonary vasodilation and ventilation-to-perfusion matching through exogenous NO delivery and  
1766 iEPO applies a similar mechanism via exogenous prostacyclin delivery. Both agents are delivered through  
1767 mechanical ventilation to ventilated alveoli in order to promote gas exchange at the capillary bed. Both  
1768 inhaled medications are desirable in this population due to pulmonary selectivity, absence of systemic  
1769 vasodilation, as well as fast onset (5-10 seconds for iNO and 30-60 seconds for iEPO) and quick titration  
1770 owing to short-half lives (10-20 seconds for iNO and 1-2 minutes for iEPO). There is no decision tree  
1771 involved in the use of iNO vs iEPO except for that patient's known drug allergies which may preclude use  
1772 of one inhaled agent in favor of the other. Of note, endothelin antagonists (e.g. bosentan), which are  
1773 not part of our perioperative standard practice, are PO medications which require reliable  
1774 gastrointestinal absorption that may not be present during high-dose inotropic support, and are not  
1775 readily titrated to effect as are the inhaled PVD, iNO and iEPO.

1776 *Contraindications and Adverse Effects.* Absolute indications for iNO in favor of iEPO are due to  
1777 prostaglandin allergy leading to anaphylaxis (extremely rare) or if the patient is pregnant due to risk for  
1778 labor induction as a result of prostacyclin agonism. Routine pregnancy testing is performed in the

1779

1780 preoperative setting in line with established preoperative anesthesia testing criteria. Parturients rarely  
1781 present for thoracic transplantation or LVAD implantation. There are no absolute contraindications to  
1782 iNO therapy in adult patients but the iNO delivery device system routinely measures the toxic  
1783 metabolite of iNO, nitrogen dioxide (NO<sub>2</sub>), which can lead to hypoxemia during metabolite  
1784 accumulation. Additionally, methemoglobinemia (MetHb) is another rare adverse occurrence of  
1785 prolonged iNO administration and MetHb levels are measured during arterial blood gas analysis.

1786 *Preliminary retrospective study supporting noninferiority hypothesis.* In a retrospective study of 51 adult  
1787 cardiothoracic surgical patients (all-comers, including thoracic transplantation, durable LVAD  
1788 implantation, and non-transplant and non-LVAD cardiac surgical patients), requiring pulmonary  
1789 vasodilation, our group illustrated similar efficacy between the use of iEPO and iNO with respect to  
1790 optimizing RV hemodynamic variables, including pulmonary vasodilation and mixed venous oxygenation  
1791 (Table 2). During this investigation, iNO was initiated in the operating room (OR) and continued during  
1792 transport and into the ICU. While in the ICU, postoperative hemodynamic stability was achieved within 2  
1793 hours and iNO was transitioned to iEPO over 30 minutes in order to provide continuous inhaled  
1794 pulmonary vasodilation and allow the patient to self-control during medication cross-over between iNO  
1795 and iEPO. Clinical variables were followed at 5-minute intervals for 1 hour after transition to iEPO. No  
1796 statistically significant differences were seen in hemodynamic variables during this transition (Table 2).  
1797 The small sample size and retrospective design, however, incorporated several confounding variables  
1798 that could not be controlled and prospective data was deemed necessary to achieve reliable conclusions  
1799 by evaluating clinical outcomes in order to change clinician practice patterns. Other investigations have  
1800 demonstrated equivalence in hemodynamic variables, mixed venous oxygenation, and ventilation-to-  
1801 perfusion matching when delivery of iNO was compared with iEPO. These studies were, however, also  
1802 retrospective or inadequately powered to rely on conclusions related to outcome measures.

1803 *The large cost differential between these two agents remains an important concern for the health*  
1804 *system:* iNO is approximately 8-fold more expensive than iEPO, according to preliminary estimates based  
1805 on PVD usage. Previous reports have estimated the cost of iNO administration to be between \$95.00 –  
1806 \$115.00 per hour during medication delivery. The cost, however, has not precisely captured the time  
1807 required to assemble the iNO delivery system as well as resources utilized to breakdown this setup into  
1808 individual components following termination of delivery. The cost of iEPO delivery is captured at \$14.83  
1809 per hour, which includes solution compounding by pharmacy as well as processing for delivery and  
1810 nebulization by respiratory care services. Additionally, the iEPO delivery-system setup is a one-time,  
1811 fixed cost for the duration of administration. Similar secondary resource utilization capture for iEPO is  
1812 required for accurate cost comparison between these two agents.

1813

1814

1815 *Sub Study*

1816 Acute right-sided heart failure (aRHF) strongly predicts the incidence of early death after left ventricular  
1817 assist device placement (Soliman OII) or heart transplantation (Taghavi S) for the surgical treatment of  
1818 advanced left-sided heart failure. Although inhaled pulmonary vasodilator (iPVD) therapy is the  
1819 mainstay for vascular afterload reduction in aRHF, more than 40% of patients may be refractory to  
1820 treatment and display persistently elevated pulmonary vascular tone without improvement in right  
1821 ventricular (RV) muscle contractility. Healthy RV muscle contraction utilizes long-chain fatty acids,  
1822 delivered to mitochondria by acylcarnitine molecules, for efficient energy production. Prior work in

1823

1824 patients with aRHF and pulmonary hypertension has identified derangements in fatty acid transport into  
1825 mitochondria by acylcarnitines. Notably, lipid infiltration in RV muscle occurs during aRHF with  
1826 overexpression of ceramide metabolites (biomarkers of lipotoxicity). (Brittain EL) In circulating plasma,  
1827 long-chain fatty acid acylcarnitine (LC FA AC) metabolites are displaced from RV muscle cells and serve  
1828 as biomarkers for aRHF. (Brittain and Luo) Reduced levels of LC FA AC are illustrated in such patients who  
1829 respond to vasodilators by lowering pulmonary vascular tone and this response is associated with  
1830 improved survival. (Rhodes CJ) Members of my mentorship committee have shown that plasma LC FA AC  
1831 levels decrease to pre-left HF values after left ventricular assist device placement. (Ahmad T) However,  
1832 the molecular pathways underlying aRHF after surgery remain unknown and the clinical utility of  
1833 complimentary plasma biomarkers in guiding therapy has not been defined. Therefore, there is a critical  
1834 need to identify the underlying metabolic aberrancies in RV muscle of cardiac surgical patients with  
1835 postoperative aRHF refractory to iPVD therapy. Without such information, novel personalized  
1836 therapeutic targets for aRHF after surgery will remain limited

### 1837 **Design & Procedures**

1838 Aim I – Development of a Definitive Clinical Trial Investigation.

1839 *1. Randomization and Double-Blinding.* The clinical research unit (CRU) will receive preoperative  
1840 notification of lung and heart transplantation patients by reviewing the transplant waitlist. Preoperative  
1841 notification of LVAD implantation will be done by the review of the cardiothoracic surgical schedule.  
1842 Using a 50% randomization process utilized and established by the CRU at Duke University Hospital,  
1843 each eligible patient will be randomized to receive either iNO or iEPO. The primary endpoint data will be  
1844 collected and documented in an electronic data capture system during the period of time the patient,  
1845 clinical care team, and study team are blinded. Primary endpoint data collection will be complete prior  
1846 to the subjects' discharge from the ICU, at which point the unblinding will occur. Since primary endpoint  
1847 data collection will occur during the blinded period, the potential for bias will be substantially  
1848 minimized.

1849 *2. Measured Outcomes.* The primary endpoint for the comparison of efficacy in the Lung Transplant  
1850 population will be the incidence of Grade 3 Primary Graft Dysfunction (PGD). This is defined by the  
1851 International Society of Heart and Lung Transplantation (ISHLT) as severe hypoxemia with a PaO<sub>2</sub>-to-  
1852 FiO<sub>2</sub> ratio < 200 or the presence of venovenous extracorporeal membrane oxygenation (VV ECMO) at an  
1853 time-point within the first 72 hours after lung transplantation. The primary endpoint for the comparison  
1854 of efficacy in LVAD patients will be incidence of moderate or severe RV failure according to Interagency  
1855 Registry for Mechanically Assisted Circulatory Support (INTERMACS) scoring. The primary endpoint for  
1856 the comparison of efficacy in the heart transplant subset will be the incidence rate of RVAD insertion.  
1857 Secondary endpoints related to clinical outcomes for all populations will be duration of postoperative  
1858 mechanical ventilation, , ICU Length of Stay (LOS), hospital LOS, incidence of acute kidney injury,  
1859 incidence of in-hospital mortality, as well as postoperative mortality at 30-days, 90-days, and 1-year  
1860 after operation (Table 1).

1861 Aim II –Cost-Capture Analysis.

1862 In parallel with the design & procedures of Aim I, the cost capture analysis component will be essential  
1863 in order to better gauge the cost due to duration of administration (variable cost) according to each  
1864 inhaled PVD. Established clinical criteria specific to each group (lung transplantation vs. heart

1865

1866 transplantation/LVAD implantation) have been developed to determine the inception of protocolized  
 1867 PVD weaning. Weaning medications according to established protocols will allow for accurate  
 1868 interpretation of the comparative length of therapy between iNO and iEPO and help prevent erroneous  
 1869 PVD usage without criteria for discontinuation. Secondary resource utilization will be documented by  
 1870 respiratory care services and itemized cost sheets will be developed.

1871 *Sub-Study*

1872 This sub study will leverage the target enrollment of 224 patients undergoing left ventricular assist  
 1873 device placement or heart transplantation in the parent study. Furthermore, cardiac tissue is collected in  
 1874 collaboration with the Duke Human Heart Repository (IRB PRO#00005621) and data will be used to test  
 1875 the causal relationship between RV myocardial fatty infiltration and plasma elevation of LC FA  
 1876 acylcarnitines in patients refractory to iPVD who develop acute RHF. This tissue and plasma is already  
 1877 being collected. In patients receiving a heart transplant, one RV tissue core sample will be obtained  
 1878 during routine, standard-of-care, post-operative endomyocardial biopsy. Core samples are the size of  
 1879 2mm pellets.

1880 **Selection of Subjects**

## 1881 Subject Groups

1882 Inhaled PVD therapy is administered to every patient undergoing thoracic transplantation and LVAD  
 1883 implantation at our institution and each patient is eligible for enrollment. Over a 3-year period (1 year  
 1884 for follow-up) we will prospectively enroll 200 lung transplant subjects and 224 heart transplant or LVAD  
 1885 implantation patients who will be informed and consented prior to their scheduled procedure. Potential  
 1886 subjects will be under the care of 1 or more investigators in this study. Consented subjects will be  
 1887 randomly assigned to 1 of 2 groups, iNO vs iEPO, to be initiated in the OR on the day of the operation  
 1888 based on accepted standard of practice and study protocol. Medication administration will be double-  
 1889 blinded, such that neither the surgical nor anesthesiology teams will be notified of the inhaled agent to  
 1890 which the patient has been randomized. Ability to unblind the delivery system will be made available to  
 1891 both teams if required to preserve optimal patient care. As per our standard practice, respiratory care  
 1892 services will manage the initiation and maintenance of inhaled PVDs in the OR and ICU, and these  
 1893 personnel will be the only practitioners notified of the actual delivered medication during study blinding.

1894

1895

## 1896 Exclusion Criteria

- 1897 · Combined Organ Transplantation (e.g., Heart-Lung, Heart-Liver, Heart-Kidney, Lung-Liver, etc.)
- 1898 · Age < 18 years old
- 1899 · Pregnancy (females of child bearing potential will receive pregnancy testing prior to cardiothoracic  
 1900 surgery as a standard of care)
- 1901 · Known allergy to prostaglandin (rare)
- 1902 · Refusal of blood products due to personal or religious preference.
- 1903 · Subject is enrolled in another study protocol, which does not allow randomization of PVD therapy

- 1904
- 1905 · Heart transplant or durable LVAD recipients with adult congenital heart disease (CHD)
- 1906 · Caveat: Does NOT meet exclusion criteria if the scheduled heart transplant or LVAD implantation is  
1907 due to heart failure from a previous heart transplantation related to CHD, performed more than 90 days  
1908 previous to the date of trial enrollment
- 1909 · Patient is scheduled to undergo lung transplantation but has undergone heart transplantation in  
1910 the previous 90 days
- 1911 · Patient is scheduled to undergo durable LVAD implantation but has undergone heart  
1912 transplantation in the previous 90 days
- 1913 · Patient is scheduled to undergo heart transplantation but has undergone lung transplantation in  
1914 the previous 90 days
- 1915 · Patients with preoperative VV ECMO as a bridge to lung transplantation
- 1916 Stopping Criteria – In the event the following criteria are met and the clinical team is in agreement,  
1917 subjects will be weaned off of their iPVD per institutional standard iPVD weaning practice. If adverse  
1918 events are encountered, the drug will be immediately stopped without weaning.
- 1919 Venoaerterial (VA) ECMO insertion remains at end of operation
- 1920 VA ECMO insertion is performed postoperatively in the ICU
- 1921 LVEF < 30% on echocardiogram at the end of the operation for heart and lung transplant subjects
- 1922 LVEF < 30% for heart and lung transplant subjects on echocardiogram noted postoperative in the ICU
- 1923 Inhaled pulmonary vasodilation is halted for reasons other than standard weaning ordered by the  
1924 clinical care team
- 1925 Adverse events related to the INO or EPO that affect the subject's welfare

1926 Data Collection

1927 Secondary measures will be hemodynamic variables (similar to those measured in Table 2) such as  
1928 transesophageal echocardiographic (TEE) evaluation of RV function based on stand-of-practice protocol,  
1929 intravenous administration of inotropes, serial measures of postoperative serum creatinine and GFR,  
1930 resolution of elevated liver function tests (heart failure patients, illustrates improvement in RV function),  
1931 incidence of thrombocytopenia (platelet count < 150 x 10<sup>9</sup>/L) and trajectory of resolution, as well as  
1932 ventilation-to-perfusion matching (arterial oxygen tension, PaO<sub>2</sub>; arterial carbon dioxide tension,  
1933 PaCO<sub>2</sub>; and fraction of inspired oxygen, FiO<sub>2</sub>). Variables will be recorded at designated time points  
1934 during the entire duration of administration – from initiation in the operating room to cessation in the  
1935 ICU. These time points include: Intraoperative before surgical incision, time = 0 (initiation of PVD), 30  
1936 minutes, 2 hours, 6 hours, 12 hours, 18 hours, 24 hours, and every 6 hours up through 72 hours after  
1937 initiation. These secondary measures will be obtained up through 72 hours after initiation regardless of  
1938 cessation or continuation of the inhaled PVD. After 72 hours, increments of every 12 hours thereafter  
1939 will be assessed if PVD administration continues. Ventilation and perfusion nuclear scans will be  
1940 obtained and recorded per standard clinical practice for each group of lung transplant recipients.  
1941 Established protocols with criteria for initiation of medication weaning have been created according to

1942

1943 each medication based on individual pharmacokinetic properties. Once established criteria are met,  
 1944 weaning of each inhaled PVD will begin and continue until the medication is terminated according to  
 1945 standardized weaning protocols established for lung transplant patients and heart transplant/LVAD  
 1946 patients.

1947 Subject follow up. Subject will be contacted by phone by a member of the research team and be asked a  
 1948 short series of questions to assess their current medical condition and any changes since surgery at 30-  
 1949 days ( $\pm 3$  days), 90-days ( $\pm 5$  days), and 1-year ( $\pm 7$  days) after surgery completion date. The phone  
 1950 follow-up should take approximately 5 minutes of the subject's time. If subjects have been admitted to a  
 1951 hospital outside of Duke Health after surgery they will be asked to sign an authorization of release to  
 1952 provide us permission to obtain medical information related to their hospitalization.

1953

1954

1955 **Blood Sampling**

1956 Blood samples will be drawn for analysis as a part of this study. One 9 ml sample of blood will be  
 1957 obtained from each patient prior to the initiation of PVD therapy and stored at 4°C prior to processing.  
 1958 This sample will be stored for Genomic DNA analysis at the completion of this study in order to assess  
 1959 patients who are responders to inhaled pulmonary vasodilation through upregulation and down  
 1960 regulation of notable vasoactive substances (e.g. endothelin, thromboxane, nitric oxide, prostaglandin,  
 1961 etc.). In addition, each subject will also be asked to sign the Genomic and Proteomic Database  
 1962 Repository (IRB Pro00015651) consent form, thus allowing the banking of their plasma and DNA samples  
 1963 as well as data to be used for future research. Participation in IRB Pro00015651 is voluntary and optional  
 1964 to all subjects consented in this parent study. Blood samples (7 ml each) will be drawn at 3 separate  
 1965 time points: 1) directly after insertion of the invasive blood pressure monitoring (arterial) line, 2) POD 1  
 1966 (8 to 24 hours after completion of surgery), and 3) POD 7 (6 days from POD 1). In each 7ml blood  
 1967 sample, 3.5ml will be collected in Sodium Citrate tubes for coagulation analysis and another 3.5ml will  
 1968 be collected in EDTA tubes for metabolomic and proteomic analysis. Plasma will be separated from  
 1969 these samples and banked at -80°C for analyses of proteomic and metabolomic signatures. Up to 30ml  
 1970 of blood will be collected during the 12 month study participation period.

1971 *Sub-Study*

1972 This sub-study only pertains to LVAD and heart transplant patients who meet inclusion criteria and have  
 1973 consented to participate in the parent study. For heart transplant patients, the POD 7 sample collection  
 1974 will occur on the day of the biopsy procedure regardless of post operative day.

1975 **Subject Recruitment and Compensation**

1976 Describe recruitment procedures, including who will introduce the study to potential subjects. Describe  
 1977 how you will ensure that subject selection is equitable and all relevant demographic groups have access  
 1978 to study participation (per 45 CFR 46.111(a)(3)). Include information about approximately how many  
 1979 DUHS subjects will be recruited. If subjects are to be compensated, provide specific prorated amounts to  
 1980 be provided for expenses such as travel and/or lost wages, and/or for inducement to participate.

1981 Subjects will be recruited either during the outpatient or inpatient evaluation phase, or contacted by  
 1982 phone. Recruitment may also occur on the day of the operation given the complexities of the transplant

1983

1984 process, which may provide obstacles to earlier enrollment. After obtaining permission from the  
 1985 operating surgeon, surgical subjects will be screened by the study coordinator by reviewing the  
 1986 transplant pre-list. Prior to asking any patient for consent to participate, the patient or Legally  
 1987 Authorized Representative (LAR) will be approached first by the surgeon or one of the members of the  
 1988 surgical care team to determine if the patient or LAR is willing to consider enrollment in the study. If so,  
 1989 the subject or LAR will either be seen during an inpatient or outpatient visit, or be contacted by phone  
 1990 and informed about the study by a member of the research team. If the individual or LAR is willing to  
 1991 consider enrollment and does not meet exclusion criteria, then the research coordinator will present the  
 1992 research protocol in its entirety. During this time, the study coordinator will answer any and all  
 1993 questions as they arise. If the subject or LAR agrees to participate, the coordinator will ask the them to  
 1994 sign and date the appropriate consent form. A copy of this consent form will be given to the subject and  
 1995 a copy of the consent form will be added to the subject's medical record. The subject or LAR will be  
 1996 given the option to sign a separate consent form to allow us to store portions of the collected blood  
 1997 specimens and any data collected under this research study and maintain these samples and data in a  
 1998 database/repository (PRO00015651) for possible use in future research studies relating to surgical  
 1999 outcomes. In the event a LAR provides consent at the time of enrollment, the subject will be  
 2000 approached once they regain the ability to provide an informed consent.

2001 Recruitment will not routinely occur on the day of the operation and most patients will be enrolled at  
 2002 least 12 hours in advance and provided at least the allowable time to review the study consent form and  
 2003 discuss their options with the PI and study personnel. There will be no direct compensation to the  
 2004 patient for recruitment.

2005 If a subject is enrolled and randomized in this study for their LVAD implantation procedure and is later  
 2006 planned to receive a heart transplant, that previously enrolled subject is eligible to be re-enrolled. The  
 2007 following caveats apply to this subpopulation of LVAD patients:

2008 A) Durable LVAD implantation may occur as a bridge to heart transplantation.

2009 B) If LVAD implantation is followed by heart transplantation WITHIN 1 year following LVAD implantation,  
 2010 then data collected up through the time of heart transplantation will be recorded and valid as a patient  
 2011 in the LVAD group.

2012 C) Data collected on or after the date of LVAD explantation/heart transplantation for such a patient will  
 2013 be considered as part of the heart transplant group.

2014 D) If LVAD implantation is followed by heart transplantation AFTER 1 year following LVAD implantation,  
 2015 then the 1 year follow-up period is complete and the patient may re-enter the trial as a heart transplant  
 2016 patient.

2017 If a subject is enrolled and randomized in this study for their durable LVAD implantation procedure and  
 2018 is scheduled to receive a new durable LVAD via an LVAD exchange operation, the subject is eligible to be  
 2019 re-enrolled.

2020

2021

2022 *Sub-Study*

2023

2024 Only subjects consented in the parent study will be asked to participate in the substudy and they will  
2025 have opt in/out ability.

2026 **Consent Process**

2027 Subject's Capacity to Give Legally Effective Consent

2028 If subjects who do not have the capacity to give legally effective consent are included, describe how  
2029 diminished capacity will be assessed. Will a periodic reassessment occur? If so, when? Will the subject  
2030 be consented if the decisional capacity improves?

2031 Explicit (written) consent will be obtained from the patient or the patient's legal decision maker.  
2032

2033

2034 **Study Interventions**

2035 Using a 50% randomization process utilized and established by the CRU, each eligible patient will be  
2036 randomized to receive either iNO or iEPO, to be initiated in the OR based on accepted standard of  
2037 practice at Duke University Hospital, during the clinical care of these patients.  
2038

2039

2040 **Risk/Benefit Assessment**

2041 Include a thorough description of how risks and discomforts will be minimized (per 45 CFR 46.111(a) (1  
2042 and 2)). Consider physical, psychological, legal, economic and social risks as applicable. If vulnerable  
2043 populations are to be included (such as children, pregnant women, prisoners or cognitively impaired  
2044 adults), what special precautions will be used to minimize risks to these subjects? Also identify what  
2045 available alternatives the person has if he/she chooses not to participate in the study. Describe the  
2046 possible benefits to the subject. What is the importance of the knowledge expected to result from the  
2047 research?

2048 There is no direct benefit of this study to the enrolled subjects. Data gathered from this study may  
2049 benefit future patients. Up to 30 ml of blood will be drawn during the 12 month study participation  
2050 period. Blood sampling will be obtained, in the majority of subjects, from indwelling arterial or central  
2051 venous lines inserted at the beginning of the intraoperative period as part of standard practice for these  
2052 operations and there will be no additional risk to the patient for obtaining such vascular access. On rare  
2053 occasion, blood sampling may be obtained from additional venipuncture sites during the postoperative  
2054 period. Risks of blood sampling if obtained through venipuncture are pain, swelling, possible infection at  
2055 the site of venipuncture. While these risks are minimal, the additional blood volume is highly unlikely to  
2056 contribute to the patient's need for blood transfusion. To minimize any potential risk to the patient from  
2057 genetic data, investigators and patients will be blinded to the individual patient's genotype. This  
2058 information will not be included in the patient chart, will remain absolutely confidential, and will not be  
2059 given to the patient or their family. DNA samples will be identified only by a coded number whose  
2060 relation to the patient's name and other identifiers is available only to the data manager. The identity of  
2061 the patient will remain anonymous in any publications which may result from this investigation.

2062 There will be no additional risks to the subjects as a result of this study. Prior to June of 2015, iNO was  
2063 the sole option for inhaled pulmonary vasodilation in this patient population and therefore utilized in



2064

2065 each operation for this indication. As of June 2015, iEPO was introduced for the same indications as iNO  
2066 in order to serve as a cost-conscious alternative to iNO and to potentially explore a different, equally  
2067 impactful pathway for clinically evident pulmonary vasodilation (as measured by Swan-Ganz catheter  
2068 data and determined by transesophageal echocardiography). There are no additional risks to the patient  
2069 aside from the rare adverse effects such as allergic reaction, as previously discussed. The most common  
2070 side effect of iNO is hypotension. The side effects common to intravenous iEPO are nausea, vomiting,  
2071 hypotension, flushing, chest pain, anxiety, dizziness, bradycardia, difficulty breathing, abdominal pain,  
2072 musculoskeletal pain and tachycardia

### 2073 **Costs to the Subject**

2074 There will be no additional costs to the subjects as a result of this study

### 2075 **Data Analysis & Statistical Considerations**

2076 Summary statistics will be computed for demographic, clinical, and outcome variables in the form of  
2077 frequencies (percentage) for categorical variables and mean (standard deviation) for continuous  
2078 variables for each arm. Univariate analysis will be performed to compare the difference of each variable  
2079 between treatment groups by chi-square or Fisher exact tests for categorical variables, and t-tests or  
2080 Wilcoxon Rank-Sum tests for continuous variables depending on data normality. The univariate results  
2081 for the outcome variables will provide information on iNO treatment effect in comparison to iEPO  
2082 without taking into account other potential confounding factors. All non-outcome variables meeting  $p <$   
2083  $0.15$  association with treatment group will be considered for variable selection to build a multivariable  
2084 regression model. For each outcome of interest, we will start with a regression model (logistic  
2085 regression for binary outcomes or generalized linear model for continuous outcomes) with all variables  
2086 selected from univariate analysis described above. Based on stepwise variable selection, we will  
2087 determine the final set of covariates to be included in the final multivariable model to test the  
2088 treatment group effect. Based on the analysis results, we will be able to understand if iNO is equivalent  
2089 to iEPO (no significant difference) or significantly better or worse than iEPO (significant treatment effect)  
2090 to address the efficacy of iNO for Aim 1. Several of secondary measures will be obtained over time. We  
2091 will apply generalized mixed model to take into account the repeated measures over time to test for  
2092 treatment effect. In the case of patients have switched to the other arm due to clinical decision, we will  
2093 conduct the primary analysis based on the intent to treat (ITT) without reclassifying treatment  
2094 assignment. In addition, protocol analysis, where only patients follow the protocol assignment are  
2095 included will also be conducted to verify ITT results. For Aim 2 to compare cost capture analysis, the  
2096 comparison of cost measures between two groups will be tested by two sample t-test.

2097 Based on recent annual operations, approximately 120 LVAD implantations, 60 heart transplantations,  
2098 and 110 Lung transplantations were performed at Duke University Hospital during FY 2014 – 2015. This  
2099 study has been individually powered to primary endpoints for each arm (Table 1) and the duration of  
2100 study enrollment has been determined according to annual operations and sample-size calculations. We  
2101 estimated sample size based on equivalence test of the incidence rates of a binary outcome (e.g. PGD  
2102 grade 3 (PGD-3)) of two treatment groups as an illustration. Assuming the incidence rate of PGD-3 under  
2103 iEPO treatment is 0.35 and acceptable margin of the equivalence is  $\pm 0.19$ , we will need 224 patients to  
2104 have 80% power to detect an actual difference at 0.05 between two treatment group under this margin.  
2105 This implies that the acceptable range of incidence rate for iNO treatment is from 0.21 to 0.59. Based on  
2106 this estimate, we propose to enroll 200 lung transplant patients and 224 LVAD and heart transplant

2107

2108 patients (n = 424) over a period of 24 to 36 months; the exact time point for trial culmination between  
2109 24 and 36 months will be dependent on enrollment rate. There will be a 50% randomization rate for  
2110 each inhaled agent such that 212 patients will receive iEPO and 212 patients will receive iNO.

2111 **Data & Safety Monitoring**

2112 The proposal is not introducing a new medication that has not been utilized by our group and safety has  
2113 been established for this patient population through clinical practice and medication usage. Safety will,  
2114 however, be determined by assessing reported, rare, adverse effects of iNO (systemic hypotension,  
2115 methemoglobinemia, and rebound pulmonary hypertension after appropriate weaning) and iEPO  
2116 (systemic hypotension, non-surgical bleeding related to thrombocytopenia, flushing, and rebound  
2117 pulmonary hypertension after appropriate weaning) in order to accurately monitor adverse events (AE)  
2118 during this study. The PI will review and sign off on AE's as they occur and perform a quarterly review  
2119 and determine if AE's are related to the study or otherwise. AE's will be reported to the IRB per HRPP  
2120 policies.

2121 Stopping Rule: Subjects who meet the stopping criteria in section 4 continued to be enrolled and  
2122 followed for primary outcome analysis.

2123 **Describe Role of External Personnel:**

2124 All data collected in the case report forms (CRF) will be collected by review of the subjects routine  
2125 medical record documentation or during the intraoperative portion of the study. All subjects will be  
2126 given a study ID in an order to maintain their identity and subject's identity will be protected and  
2127 confidentially maintained. Barcodes will be affixed to each study sample collected according to the  
2128 protocol. For future review, the study number and barcode will be the only identifying information  
2129 associated with the subject. All paper data will be stored in a locked cabinet in the research teams office  
2130 as outlined in the research data security plan. Any computerized data will be stored within the Duke  
2131 University Medical Center's Database, which is password protected, and located behind Duke  
2132 Computing firewalls. Only the PI and the statisticians will have access to the data obtained from these  
2133 cases.
