# Supplementary material
Source: PubMed Central journal article supplement (PMC8600451)
Supplement: jamasurg-e215856-s004.pdf [file jamasurg-e215856-s004.pdf]

\*Indicates required information. Only first name, last name, and suffix will appear in PubMed.

| <b>*Group Name(s): INSPIRE-FLO Investigators</b> |                   |                    |                   |                    |                                     |                                |                                                                                                   |  |  |  |  |  |
|--------------------------------------------------|-------------------|--------------------|-------------------|--------------------|-------------------------------------|--------------------------------|---------------------------------------------------------------------------------------------------|--|--|--|--|--|
| <b>*First Name and Middle Initial</b>            | <b>*Last Name</b> | <b>*Suffix (eg</b> | <b>Academic I</b> | <b>Institution</b> | <b>Location (city, state/provin</b> | <b>Role or Contribution, e</b> | <b>Group (if more than 1 Group listed in the byline) and/or Subgroup (eg, Steering Committee)</b> |  |  |  |  |  |
| Angelito                                         | Agbo              |                    |                   |                    |                                     |                                |                                                                                                   |  |  |  |  |  |
| Terry                                            | Ainsworth         |                    |                   |                    |                                     |                                |                                                                                                   |  |  |  |  |  |
| Hakim A                                          | Ali               |                    |                   |                    |                                     |                                |                                                                                                   |  |  |  |  |  |
| Samuel                                           | Belgique          |                    |                   |                    |                                     |                                |                                                                                                   |  |  |  |  |  |
| Tiffany                                          | Bisanar           |                    |                   |                    |                                     |                                |                                                                                                   |  |  |  |  |  |
| Michael                                          | Blank             |                    |                   |                    |                                     |                                |                                                                                                   |  |  |  |  |  |
| Desiree                                          | Bonadonna         |                    |                   |                    |                                     |                                |                                                                                                   |  |  |  |  |  |
| Jason                                            | Boyle             |                    |                   |                    |                                     |                                |                                                                                                   |  |  |  |  |  |
| Carla                                            | Bremenour         |                    |                   |                    |                                     |                                |                                                                                                   |  |  |  |  |  |
| Jessica                                          | Burroughs         |                    |                   |                    |                                     |                                |                                                                                                   |  |  |  |  |  |
| Rachel                                           | Byelene           |                    |                   |                    |                                     |                                |                                                                                                   |  |  |  |  |  |
| Anne                                             | Cherry            |                    |                   |                    |                                     |                                |                                                                                                   |  |  |  |  |  |
| Carl                                             | Clark             |                    |                   |                    |                                     |                                |                                                                                                   |  |  |  |  |  |
| Kristen                                          | Collins           |                    |                   |                    |                                     |                                |                                                                                                   |  |  |  |  |  |
| Taryn                                            | Cooper            |                    |                   |                    |                                     |                                |                                                                                                   |  |  |  |  |  |
| Kelsey                                           | Decker            |                    |                   |                    |                                     |                                |                                                                                                   |  |  |  |  |  |
| Jose M                                           | Del Rio           |                    |                   |                    |                                     |                                |                                                                                                   |  |  |  |  |  |
| Shruti                                           | Desai             |                    |                   |                    |                                     |                                |                                                                                                   |  |  |  |  |  |
| Sebastian                                        | Diaz              |                    |                   |                    |                                     |                                |                                                                                                   |  |  |  |  |  |
| Jill                                             | Engel             |                    |                   |                    |                                     |                                |                                                                                                   |  |  |  |  |  |
| William                                          | Fulkerson         | Jr.                |                   |                    |                                     |                                |                                                                                                   |  |  |  |  |  |
| Loreta                                           | Greco             |                    |                   |                    |                                     |                                |                                                                                                   |  |  |  |  |  |
| Nazish                                           | Hashmi            |                    |                   |                    |                                     |                                |                                                                                                   |  |  |  |  |  |
| Teresa                                           | Hoskins           |                    |                   |                    |                                     |                                |                                                                                                   |  |  |  |  |  |
| Ehimemen                                         | Iboaya            |                    |                   |                    |                                     |                                |                                                                                                   |  |  |  |  |  |
| Carrie                                           | Johnson           |                    |                   |                    |                                     |                                |                                                                                                   |  |  |  |  |  |
| Mandisa-Maia                                     | Jones             |                    |                   |                    |                                     |                                |                                                                                                   |  |  |  |  |  |
| Jorn                                             | Karhausen         |                    |                   |                    |                                     |                                |                                                                                                   |  |  |  |  |  |
| Joel                                             | Kester            |                    |                   |                    |                                     |                                |                                                                                                   |  |  |  |  |  |
| Rebecca                                          | Klinger           |                    |                   |                    |                                     |                                |                                                                                                   |  |  |  |  |  |
| Casi                                             | Larish            |                    |                   |                    |                                     |                                |                                                                                                   |  |  |  |  |  |
| Trevor                                           | Lee               |                    |                   |                    |                                     |                                |                                                                                                   |  |  |  |  |  |
| Jessica                                          | Lumbard           |                    |                   |                    |                                     |                                |                                                                                                   |  |  |  |  |  |
| Yasmin                                           | Maisonave         |                    |                   |                    |                                     |                                |                                                                                                   |  |  |  |  |  |
| Negmeldeen                                       | Mamoun            |                    |                   |                    |                                     |                                |                                                                                                   |  |  |  |  |  |
| Michael                                          | Manning           |                    |                   |                    |                                     |                                |                                                                                                   |  |  |  |  |  |
| Joseph                                           | Mathew            |                    |                   |                    |                                     |                                |                                                                                                   |  |  |  |  |  |
| Sharon                                           | McCartney         |                    |                   |                    |                                     |                                |                                                                                                   |  |  |  |  |  |
| Lynn                                             | McGugan           |                    |                   |                    |                                     |                                |                                                                                                   |  |  |  |  |  |
| Beth                                             | McLendon-Arvik    |                    |                   |                    |                                     |                                |                                                                                                   |  |  |  |  |  |
| Amber                                            | Mcvey             |                    |                   |                    |                                     |                                |                                                                                                   |  |  |  |  |  |
| Omar                                             | Mohamedaly        |                    |                   |                    |                                     |                                |                                                                                                   |  |  |  |  |  |
| Margaret A                                       | Murphy            |                    |                   |                    |                                     |                                |                                                                                                   |  |  |  |  |  |
| Alina                                            | Nicoara           |                    |                   |                    |                                     |                                |                                                                                                   |  |  |  |  |  |
| Thomas                                           | Owens             |                    |                   |                    |                                     |                                |                                                                                                   |  |  |  |  |  |
| Scott                                            | Palmer            |                    |                   |                    |                                     |                                |                                                                                                   |  |  |  |  |  |
| Jhana                                            | Parikh            |                    |                   |                    |                                     |                                |                                                                                                   |  |  |  |  |  |
| Matthew                                          | Pipeling          |                    |                   |                    |                                     |                                |                                                                                                   |  |  |  |  |  |
| Mihai                                            | Podgoreanu        |                    |                   |                    |                                     |                                |                                                                                                   |  |  |  |  |  |
| Angela                                           | Pollak            |                    |                   |                    |                                     |                                |                                                                                                   |  |  |  |  |  |

\*Indicates required information. Only first name, last name, and suffix will appear in PubMed.

| *First Name and Middle Initial | *Last Name     | *Suffix (eg | Academic | Institution | Location (city, state/provin | Role or Contribution, e | Group (if more than 1 Group listed in the byline) and/or Subgroup (eg, Steering Committee) |  |  |  |  |  |  |  |
|--------------------------------|----------------|-------------|----------|-------------|------------------------------|-------------------------|--------------------------------------------------------------------------------------------|--|--|--|--|--|--|--|
| Dayana                         | Ramos          |             |          |             |                              |                         |                                                                                            |  |  |  |  |  |  |  |
| Claudette                      | Ramsey         |             |          |             |                              |                         |                                                                                            |  |  |  |  |  |  |  |
| Jake                           | Ribet          |             |          |             |                              |                         |                                                                                            |  |  |  |  |  |  |  |
| Erick                          | Saldivar       |             |          |             |                              |                         |                                                                                            |  |  |  |  |  |  |  |
| Amy                            | Shing          |             |          |             |                              |                         |                                                                                            |  |  |  |  |  |  |  |
| Laurie                         | Snyder         |             |          |             |                              |                         |                                                                                            |  |  |  |  |  |  |  |
| Kevin                          | Sowers         |             |          |             |                              |                         |                                                                                            |  |  |  |  |  |  |  |
| Amanda                         | Spiritos       |             |          |             |                              |                         |                                                                                            |  |  |  |  |  |  |  |
| Mark                           | Stafford-Smith |             |          |             |                              |                         |                                                                                            |  |  |  |  |  |  |  |
| Fabian                         | Stone          |             |          |             |                              |                         |                                                                                            |  |  |  |  |  |  |  |
| Madhav                         | Swaminathan    |             |          |             |                              |                         |                                                                                            |  |  |  |  |  |  |  |
| Annemarie                      | Thompson       |             |          |             |                              |                         |                                                                                            |  |  |  |  |  |  |  |
| Jamie                          | Todd           |             |          |             |                              |                         |                                                                                            |  |  |  |  |  |  |  |
| Dean                           | Van Hart       |             |          |             |                              |                         |                                                                                            |  |  |  |  |  |  |  |
| Eleanor                        | Vega           |             |          |             |                              |                         |                                                                                            |  |  |  |  |  |  |  |
| Cameron                        | Wells          |             |          |             |                              |                         |                                                                                            |  |  |  |  |  |  |  |
| Ian                            | Welsby         |             |          |             |                              |                         |                                                                                            |  |  |  |  |  |  |  |
| Meredith                       | Whitacre       |             |          |             |                              |                         |                                                                                            |  |  |  |  |  |  |  |
| Jordan                         | Whitson        |             |          |             |                              |                         |                                                                                            |  |  |  |  |  |  |  |
| Barbara                        | Wiernek        |             |          |             |                              |                         |                                                                                            |  |  |  |  |  |  |  |
| Genevieve                      | Wroblewski     |             |          |             |                              |                         |                                                                                            |  |  |  |  |  |  |  |
| Vincent                        | Yeboah         |             |          |             |                              |                         |                                                                                            |  |  |  |  |  |  |  |
| Lorenzo                        | Zaffiri        |             |          |             |                              |                         |                                                                                            |  |  |  |  |  |  |  |
