# Supplementary material
Source: PubMed Central journal article supplement (PMC8600451)
Supplement: jamasurg-e215856-s005.pdf [file jamasurg-e215856-s005.pdf]

## Data Sharing Statement

Ghadimi. Inhaled Pulmonary Vasodilator Therapy in Adult Lung Transplant. *JAMA Surg.* Published November 17, 2021. doi:10.1001/jamasurg.2021.5856

### Data

**Data available:** Yes

**Data types:** Deidentified participant data, Data dictionary

**How to access data:** [kg142@duke.edu](mailto:kg142@duke.edu)

**When available:** With publication

### Supporting Documents

**Document types:** Statistical/analytic code, Informed consent form

**How to access documents:** informed consent: please email [kg142@duke.edu](mailto:kg142@duke.edu) statistical analytic code: please email [mary.cooter@duke.edu](mailto:mary.cooter@duke.edu)

**When available:** With publication

### Additional Information

**Who can access the data:** Researchers with a proposal that is approved to use the data available

**Types of analyses:** no restrictions

**Mechanisms of data availability:** after approval of a proposal and with agreement
